# Supplementary material
Source: PubMed Central journal article supplement (PMC5703285)
Supplement: pnas.1708109114.sapp.pdf [file pnas.1708109114.sapp.pdf]

## **SUPPORTING INFORMATION (*SI Appendix*)**

### **Climate extremes and predicted warming threaten Mediterranean Holocene firs forests refugia**

Raúl Sánchez-Salguero, J. Julio Camarero, Marco Carrer, Emilia Gutiérrez, Arben Q. Alla, Laia Andreu-Hayles, Andrea Hevia, Athanasios Koutavas, Elisabet Martínez-Sancho, Paola Nola, Andreas Papadopoulos, Edmond Pasho, Ervin Toromani, José A. Carreira and Juan C. Linares

The purpose of this supplementary material is to provide information that is of less central importance to the paper and that cannot be included in the main body of the text because of space limitations. The Supplementary Information contains 9 tables and 9 figures. The sequence of the supplementary figures and tables follows the citation order in the main text.

## Supplementary Tables

**Table S1.** Main characteristics of sampled sites (codes are as in *SI Appendix*, Fig. S1). Dbh: diameter at breast height. Number of trees and radii per site. Tree-ring width (TRW) was determined from cores taken at 1.3 m. Rbt: is the mean correlation between trees of indexed tree-ring width series; AC: is the first order autocorrelation, and MS: is the mean sensitivity considering the common 1930-2010 period. The EPS (expressed population signal) was > 0.85 for all sites in the 1950-2010 period (61).

| Tree species            | Site code | Site name                   | Country | Latitude (N) | Longitude (-W, +E) | Elevation (m a.s.l.) | Aspect | Slope | Dbh (cm) | N° trees /radii | TRW ± SD (mm) | Rbt  | AC   | MS        | Time span (years) |
|-------------------------|-----------|-----------------------------|---------|--------------|--------------------|----------------------|--------|-------|----------|-----------------|---------------|------|------|-----------|-------------------|
| <i>A. alba</i>          | ROSE      | Rosello                     | Italy   | 42.50        | 14.57              | 1086                 | E      | 35    | 89.7     | 15/32           | 2.45 ± 0.55   | 0.30 | 0.09 | 0.15      | 1848–1998         |
|                         | PESC      | Pescopennataro              | Italy   | 42.48        | 14.50              | 1370                 | E      | 28    | 67.1     | 15/35           | 1.61 ± 0.50   | 0.42 | 0.32 | 0.16      | 1823–1998         |
|                         | IANN      | Iannace (Pollino)           | Italy   | 40.57        | 16.35              | 1400                 | N-W    | 20    | 92.0     | 14/31           | 1.38 ± 0.95   | 0.21 | 0.13 | 0.18      | 1720–1998         |
|                         | CUGN      | Cugno dell' Acero (Pollino) | Italy   | 40.57        | 16.37              | 1350                 | N-W    | 25    | 76.6     | 16/35           | 1.29 ± 0.59   | 0.34 | 0.08 | 0.17      | 1703–1998         |
|                         | PANT      | Pantano (Pollino)           | Italy   | 40.57        | 16.40              | 1500                 | N-E    | 25    | 111.8    | 16/34           | 1.39 ± 0.80   | 0.29 | 0.22 | 0.14      | 1697–1998         |
|                         | GARA      | Gariglione                  | Italy   | 39.20        | 17.07              | 1680                 | S-E    | 28    | 83.4     | 13/27           | 1.59 ± 0.82   | 0.31 | 0.23 | 0.15      | 1719–1999         |
|                         | GUAR      | Guara                       | Spain   | 42.30        | -0.12              | 1428                 | N-NW   | 47    | 52.5     | 23/46           | 3.11 ± 0.79   | 0.48 | 0.09 | 0.20      | 1887–2011         |
|                         | PORH      | Peña Oroel-High             | Spain   | 42.52        | -0.32              | 1604                 | N-NW   | 36    | 59.1     | 12/24           | 2.57 ± 0.79   | 0.71 | 0.78 | 0.20      | 1892–2000         |
|                         | PORL      | Peña Oroel-Low              | Spain   | 42.52        | -0.32              | 1587                 | N      | 24    | 46.5     | 23/46           | 2.41 ± 0.70   | 0.67 | 0.76 | 0.18      | 1889–2000         |
|                         | SJPE      | San Juan de la Peña         | Spain   | 42.52        | -0.41              | 1393                 | N-NE   | 22    | 46.0     | 14/28           | 2.37 ± 0.49   | 0.57 | 0.85 | 0.23      | 1855–1999         |
|                         | BOUM      | Boumort                     | Spain   | 42.20        | 1.20               | 1583                 | NE     | 35    | 64.2     | 17/40           | 1.79 ± 1.24   | 0.36 | 0.16 | 0.22      | 1804–2002         |
| MONT                    | Montseny  | Spain                       | 41.77   | 2.43         | 1550               | SW                   | 22     | 68.0  | 21/50    | 1.22 ± 0.78     | 0.37          | 0.26 | 0.17 | 1587–2010 |                   |
| <i>A. borisii-regis</i> | ABRH      | Bredhi i Hotovës High       | Albania | 40.34        | 20.38              | 1361                 | NW     | 25    | 46.3     | 22/31           | 2.30 ± 1.03   | 0.26 | 0.77 | 0.22      | 1900–2010         |
|                         | ABRM      | Bredhi i Hotovës Middle     | Albania | 40.35        | 20.39              | 1144                 | SE     | 22    | 45.4     | 36/54           | 2.43 ± 1.26   | 0.3  | 0.76 | 0.26      | 1874–2010         |
|                         | ABRL      | Bredhi i Hotovës Low        | Albania | 40.35        | 20.38              | 1058                 | N      | 19    | 39.1     | 18/28           | 1.83 ± 0.68   | 0.31 | 0.72 | 0.2       | 1893–2010         |
|                         | KARP1     | Karpenissi (Evrytania)      | Greece  | 38.88        | 21.86              | 1120                 | E      | 48    | 47.0     | 12/23           | 1.85 ± 0.85   | 0.61 | 0.73 | 0.19      | 1890–2012         |
|                         | PERT      | Pertouli (Trikala)          | Greece  | 39.55        | 21.47              | 1270                 | E-SE   | 23    | 49.0     | 12/21           | 2.46 ± 0.34   | 0.57 | 0.75 | 0.19      | 1880-2013         |
| <i>A. cephalonica</i>   | AINO      | Ainos Mountain              | Greece  | 38.14        | 20.67              | 1450                 | NE     | 35    | 68.4     | 23/54           | 1.07 ± 0.66   | 0.54 | 0.68 | 0.23      | 1769-2007         |
|                         | KARP2     | Karpenissi (Evrytania)      | Greece  | 38.87        | 21.86              | 1260                 | NE     | 35    | 45.3     | 15/25           | 1.47 ± 0.37   | 0.44 | 0.80 | 0.19      | 1857–2013         |
|                         | PARN      | Parnitha (Attica)           | Greece  | 38.17        | 23.74              | 1223                 | E      | 30    | 44.0     | 12/19           | 1.46 ± 0.24   | 0.49 | 0.77 | 0.21      | 1868–2012         |
| <i>A. cilicica</i>      | leb2*     | Wadi Balat                  | Lebanon | 34.47        | 36.23              | 1175                 | NW     | -     | 34.3     | 16/19           | 1.15 ± 0.33   | 0.46 | 0.82 | 0.25      | 1722-2001         |
|                         | syr2*     | Bedayat Al Khandak Al Tawil | Syria   | 35.57        | 36.20              | 1450                 | W      | -     | 23.9     | 33/35           | 0.79 ± 0.26   | 0.52 | 0.77 | 0.32      | 1795-2001         |
|                         | tu24*     | Gazipasa Forest, Antalya    | Turkey  | 36.45        | 32.52              | 1770                 | SW     | -     | 49.1     | 7/7             | 1.59 ± 0.41   | 0.50 | 0.83 | 0.22      | 1797-2003         |
|                         | DEAC      | Derebukak                   | Turkey  | 37.32        | 31.46              | 1600                 | SO     | -     | 30.1     | 6/10            | 2.48 ± 0.72   | 0.59 | 0.79 | 0.23      | 1869-2009         |
|                         | IBAC      | Ibradi Civarinda            | Turkey  | 37.21        | 31.49              | 1500                 | SO     | -     | 28.5     | 5/10            | 2.28 ± 0.61   | 0.56 | 0.62 | 0.22      | 1943-2009         |
| <i>A. pinsapo</i>       | APSB      | Sierra Bermeja              | Spain   | 36.48        | -5.21              | 1300                 | N      | 40    | 37.3     | 23/26           | 1.17 ± 0.43   | 0.57 | 0.76 | 0.30      | 1795-2014         |
|                         | APSG      | Sierra de Grazalema         | Spain   | 36.77        | -5.42              | 1275                 | N      | 33    | 32.1     | 64/85           | 2.25 ± 0.59   | 0.50 | 0.70 | 0.26      | 1764-2015         |
|                         | APSN      | Sierra de las Nieves        | Spain   | 36.72        | -5.10              | 1350                 | N-NE   | 27    | 31.8     | 69/97           | 1.65 ± 0.97   | 0.52 | 0.81 | 0.24      | 1710-2015         |
| <i>A. maroccana</i>     | ABMC      | Talassemtane                | Morocco | 35.13        | -5.12              | 1600                 | NO     | 27    | 29.5     | 14/23           | 1.45 ± 0.19   | 0.42 | 0.73 | 0.22      | 1798-2006         |
| <i>A. tazaotana</i>     | ABTZ      | Tazaot                      | Morocco | 35.23        | -5.08              | 1685                 | NE     | 31    | 45.1     | 14/18           | 2.91 ± 0.73   | 0.48 | 0.82 | 0.23      | 1689-2009         |

\* ITRDB database chronologies (<https://www.ncdc.noaa.gov/data-access/paleoclimatology-data>)

**Table S2.** Modelled percentage change in average tree-ring width (TRWi) for projected climate change trends (TRWi<sub>p</sub>) considering the ensemble IPCC AR5 emission scenarios (RCP 4.5 and RCP 8.5). Values are calculated such as the projected 2011-2049 and 2050-2100 annual mean minus measured 1950–2010 annual mean. Trends ( $\tau$ , Pearson correlation coefficient) of site mean tree-ring width indices series considering the 2011–2100 period following growth projections based on two IPCC AR5 emission scenarios (see Fig. 4 and *SI Appendix* Fig. S8).

| Tree species            | Site code | 2011-2049 |         | 2050-2100 |         | 2011-2100               |         |
|-------------------------|-----------|-----------|---------|-----------|---------|-------------------------|---------|
|                         |           | RCP 4.5   | RCP 8.5 | RCP 4.5   | RCP 8.5 | Trend ( $\tau$ Pearson) |         |
|                         |           | Mean      | Mean    | Mean      | Mean    | RCP 4.5                 | RCP 8.5 |
| <i>A. alba</i>          | ROSE      | 2.4       | 42.6    | -5.2      | 68.1    | -0.15                   | 0.85    |
|                         | PESC      | 7.1       | 37.4    | -7.2      | 61.0    | -0.34                   | 0.58    |
|                         | IANN      | -5.6      | -7.8    | -8.7      | -19.3   | -0.25                   | -0.79   |
|                         | CUGN      | -9.1      | -13.3   | -17.9     | -35.6   | -0.23                   | -0.71   |
|                         | PANT      | -2.3      | -10.6   | -11.2     | -13.3   | -0.44                   | -0.63   |
|                         | GARA      | -3.2      | -4.9    | -6.5      | -7.5    | 0.12                    | -0.26   |
|                         | GUAR      | -3.9      | -5.8    | -14.4     | -18.7   | -0.33                   | -0.77   |
|                         | PORH      | -18.8     | -8.3    | -35.2     | -42.3   | -0.73                   | -0.93   |
|                         | PORL      | -12.1     | -10.4   | -18.8     | -32.7   | -0.50                   | -0.83   |
|                         | SJPE      | -31.6     | -5.8    | -68.2     | -59.4   | -0.81                   | -0.92   |
|                         | BOUM      | 3.7       | -2.6    | 34.4      | 35.7    | 0.78                    | 0.85    |
| MONT                    | 45.9      | 35.1      | 65.4    | 59.8      | 0.91    | 0.91                    |         |
| <i>A. borisii-regis</i> | ABRH      | 18.9      | 15.2    | 27.1      | 30.1    | 0.62                    | 0.85    |
|                         | ABRM      | -9.3      | -8.7    | -14.6     | -41.8   | -0.62                   | -0.97   |
|                         | ABRL      | -10.9     | -6.8    | -38.1     | -21.6   | -0.83                   | -0.87   |
|                         | KARP1     | -2.5      | -3.2    | -6.8      | -8.7    | -0.33                   | -0.51   |
|                         | PERT      | -9.8      | -7.8    | -48.3     | -58.6   | -0.77                   | -0.92   |
| <i>A. cephalonica</i>   | AINO      | -1.3      | 3.2     | -10.8     | -11.5   | -0.27                   | -0.58   |
|                         | KARP2     | -7.8      | -7.5    | -24.7     | -33.3   | -0.69                   | -0.87   |
|                         | PARN      | 13.9      | 7.4     | 4.8       | 5.2     | -0.30                   | 0.10    |
| <i>A. cilicica</i>      | leb2      | -9.3      | -11.3   | -36.9     | -38.2   | -0.79                   | -0.90   |
|                         | syr2      | -7.8      | 6.3     | -16.1     | -21.3   | -0.29                   | -0.75   |
|                         | tu24      | 12.5      | 15.1    | 32.1      | 35.4    | 0.55                    | 0.80    |
|                         | DEAC      | 30.6      | 20.4    | 53.1      | 49.8    | 0.79                    | 0.88    |
|                         | IBAC      | 4.5       | 6.8     | 6.7       | 6.9     | 0.11                    | 0.07    |
| <i>A. pinsapo</i>       | APSB      | 15.2      | 14.5    | 68.3      | 47.3    | 0.68                    | 0.79    |
|                         | APSG      | 2.2       | 15.1    | -5.7      | -10.6   | -0.41                   | -0.77   |
|                         | APSN      | 8.2       | 14.2    | 17.3      | 14.7    | 0.17                    | -0.10   |
| <i>A. maroccana</i>     | ABMC      | -3.6      | -1.6    | -12.2     | -16.5   | -0.53                   | -0.84   |
| <i>A. tazaotana</i>     | ABTZ      | -9.6      | -10.1   | -25.7     | -30.0   | -0.64                   | -0.86   |

**Table S3.** Pearson correlation coefficients calculated between observed site series of tree-ring width indices (TRWi) and VS-Lite indices (TRWi<sub>VSL</sub>) for the calibration period (1950-2010); and for the sub-periods 1950–1980 and 1980–2010 (see *SI Appendix*, Fig. S6), also considering projected site series of tree-ring width indices (TRWi<sub>p</sub>) and VS-Lite future indices (TRWi<sub>p-VSL</sub>) for the periods 2010-2050 and 2050-2100 and two IPCC AR5 emission scenarios (RCP 4.5 and RCP 8.5). Correlation values higher than 0.25 are significant at  $P < 0.05$ .

| Tree species            | Site code | Period    |           |           | IPCC emission scenarios |           |           |           |
|-------------------------|-----------|-----------|-----------|-----------|-------------------------|-----------|-----------|-----------|
|                         |           | 1950-1980 | 1980-2010 | 1950-2010 | RCP 4.5                 |           | RCP 8.5   |           |
|                         |           |           |           |           | 2010-2050               | 2050-2100 | 2010-2050 | 2050-2100 |
| <i>A. alba</i>          | ROSE      | 0.41      | 0.33      | 0.36      | 0.34                    | 0.52      | 0.69      | 0.68      |
|                         | PESC      | 0.33      | 0.22      | 0.28      | 0.27                    | 0.36      | 0.29      | 0.30      |
|                         | IANN      | 0.45      | 0.51      | 0.42      | 0.46                    | 0.38      | 0.57      | 0.70      |
|                         | CUGN      | 0.47      | 0.30      | 0.31      | 0.35                    | 0.34      | 0.42      | 0.44      |
|                         | PANT      | 0.35      | 0.24      | 0.26      | 0.24                    | 0.25      | 0.34      | 0.54      |
|                         | GARA      | 0.41      | 0.48      | 0.39      | 0.38                    | 0.55      | 0.49      | 0.34      |
|                         | GUAR      | 0.59      | 0.62      | 0.67      | 0.47                    | 0.40      | 0.50      | 0.59      |
|                         | PORH      | 0.45      | 0.32      | 0.34      | 0.33                    | 0.41      | 0.53      | 0.85      |
|                         | PORL      | 0.49      | 0.38      | 0.44      | 0.43                    | 0.33      | 0.55      | 0.64      |
|                         | SJPE      | 0.52      | 0.38      | 0.44      | 0.44                    | 0.50      | 0.62      | 0.86      |
|                         | BOUM      | 0.41      | 0.53      | 0.40      | 0.65                    | 0.59      | 0.58      | 0.65      |
| MONT                    | 0.55      | 0.41      | 0.44      | 0.82      | 0.77                    | 0.87      | 0.90      |           |
| <i>A. borisii-regis</i> | ABRH      | 0.40      | 0.32      | 0.31      | 0.41                    | 0.35      | 0.63      | 0.69      |
|                         | ABRM      | 0.43      | 0.35      | 0.41      | 0.63                    | 0.58      | 0.61      | 0.79      |
|                         | ABRL      | 0.41      | 0.34      | 0.39      | 0.57                    | 0.41      | 0.85      | 0.59      |
|                         | KARP1     | 0.36      | 0.37      | 0.38      | 0.29                    | 0.43      | 0.40      | 0.45      |
|                         | PERT      | 0.33      | 0.42      | 0.28      | 0.45                    | 0.49      | 0.58      | 0.89      |
| <i>A. cephalonica</i>   | AINO      | 0.18      | 0.15      | 0.26      | 0.25                    | 0.36      | 0.34      | 0.44      |
|                         | KARP2     | 0.31      | 0.32      | 0.36      | 0.24                    | 0.56      | 0.38      | 0.67      |
|                         | PARN      | 0.28      | 0.38      | 0.24      | 0.26                    | 0.24      | 0.31      | 0.33      |
| <i>A. cilicica</i>      | leb2      | 0.55      | 0.47      | 0.51      | 0.79                    | 0.39      | 0.77      | 0.82      |
|                         | syr2      | 0.20      | 0.15      | 0.19      | 0.29                    | 0.29      | 0.34      | 0.72      |
|                         | tu24      | 0.37      | 0.27      | 0.30      | 0.50                    | 0.40      | 0.63      | 0.74      |
|                         | DEAC      | 0.48      | 0.49      | 0.43      | 0.74                    | 0.58      | 0.73      | 0.34      |
|                         | IBAC      | 0.45      | 0.31      | 0.36      | 0.28                    | 0.37      | 0.34      | 0.29      |
| <i>A. pinsapo</i>       | APSB      | 0.37      | 0.37      | 0.37      | 0.27                    | 0.25      | 0.36      | 0.51      |
|                         | APSG      | 0.45      | 0.47      | 0.44      | 0.43                    | 0.24      | 0.49      | 0.59      |
|                         | APSN      | 0.38      | 0.52      | 0.46      | 0.29                    | 0.26      | 0.42      | 0.35      |
| <i>A. maroccana</i>     | ABMC      | 0.49      | 0.35      | 0.38      | 0.35                    | 0.37      | 0.71      | 0.82      |
| <i>A. tazaotana</i>     | ABTZ      | 0.47      | 0.41      | 0.41      | 0.64                    | 0.42      | 0.80      | 0.81      |

**Table S4.** Statistics of the Bayesian estimation of VS-Lite growth response parameters (1950-2010). Statistics of the Bayesian estimation of the site-by-site tuned VS-Lite growth response parameters ( $T_1$ ,  $T_2$ ,  $M_1$ , and  $M_2$ ) for the period 1950-2010 and two sub-periods (1950-1980 and 1980-2010).

| Tree species               | Parameter<br>(unit) | 1950-2010 |        |        |       | 1950-1980 |        |        |       | 1980-2010 |        |        |       |
|----------------------------|---------------------|-----------|--------|--------|-------|-----------|--------|--------|-------|-----------|--------|--------|-------|
|                            |                     | Mean      | Min    | Max    | SD    | Mean      | Min    | Max    | SD    | Mean      | Min    | Max    | SD    |
| <i>Abies alba</i> -Italy   | $T_1$ (°C)          | 7.893     | 6.950  | 8.323  | 0.495 | 8.254     | 8.032  | 8.638  | 0.206 | 7.294     | 6.758  | 8.193  | 0.575 |
|                            | $T_2$ (°C)          | 12.839    | 11.179 | 13.811 | 0.995 | 12.986    | 11.130 | 15.292 | 1.381 | 12.659    | 10.453 | 15.613 | 2.033 |
|                            | $M_1$ (v/v)         | 0.024     | 0.001  | 0.083  | 0.030 | 0.025     | 0.007  | 0.068  | 0.022 | 0.034     | 0.002  | 0.064  | 0.024 |
|                            | $M_2$ (v/v)         | 0.163     | 0.102  | 0.319  | 0.085 | 0.184     | 0.150  | 0.210  | 0.026 | 0.127     | 0.100  | 0.178  | 0.030 |
| <i>Abies alba</i> -Spain   | $T_1$ (°C)          | 2.573     | 1.589  | 5.707  | 1.564 | 4.284     | 2.358  | 8.246  | 2.097 | 3.111     | 1.696  | 6.548  | 1.938 |
|                            | $T_2$ (°C)          | 13.843    | 10.840 | 23.020 | 4.693 | 13.443    | 10.650 | 18.449 | 3.187 | 12.993    | 10.455 | 17.033 | 2.797 |
|                            | $M_1$ (v/v)         | 0.057     | 0.020  | 0.090  | 0.031 | 0.031     | 0.001  | 0.071  | 0.028 | 0.040     | 0.026  | 0.055  | 0.011 |
|                            | $M_2$ (v/v)         | 0.375     | 0.261  | 0.469  | 0.091 | 0.368     | 0.267  | 0.482  | 0.080 | 0.387     | 0.260  | 0.483  | 0.081 |
| <i>Abies borisii-regis</i> | $T_1$ (°C)          | 3.932     | 2.911  | 6.963  | 1.711 | 3.378     | 2.100  | 5.715  | 1.371 | 5.381     | 3.074  | 7.891  | 2.175 |
|                            | $T_2$ (°C)          | 12.225    | 10.585 | 14.023 | 1.461 | 12.568    | 11.007 | 14.420 | 1.245 | 11.697    | 10.917 | 12.890 | 0.814 |
|                            | $M_1$ (v/v)         | 0.036     | 0.003  | 0.081  | 0.034 | 0.040     | 0.006  | 0.088  | 0.030 | 0.060     | 0.025  | 0.087  | 0.025 |
|                            | $M_2$ (v/v)         | 0.389     | 0.177  | 0.489  | 0.122 | 0.395     | 0.190  | 0.487  | 0.119 | 0.341     | 0.164  | 0.470  | 0.148 |
| <i>Abies cephalonica</i>   | $T_1$ (°C)          | 7.340     | 5.438  | 8.563  | 1.669 | 7.285     | 5.157  | 8.570  | 1.856 | 8.181     | 8.058  | 8.406  | 0.195 |
|                            | $T_2$ (°C)          | 13.014    | 11.238 | 14.822 | 1.792 | 12.300    | 10.570 | 15.488 | 2.764 | 13.958    | 11.000 | 18.012 | 3.632 |
|                            | $M_1$ (v/v)         | 0.035     | 0.008  | 0.079  | 0.038 | 0.025     | 0.005  | 0.048  | 0.022 | 0.054     | 0.053  | 0.055  | 0.001 |
|                            | $M_2$ (v/v)         | 0.135     | 0.109  | 0.177  | 0.037 | 0.144     | 0.113  | 0.199  | 0.048 | 0.163     | 0.106  | 0.195  | 0.050 |

**Table S4.** continued

| Tree species           | Parameter<br>(unit) | 1950-2010 |        |        |       | 1950-1980 |        |        |       | 1980-2010 |        |        |       |
|------------------------|---------------------|-----------|--------|--------|-------|-----------|--------|--------|-------|-----------|--------|--------|-------|
|                        |                     | Mean      | Min    | Max    | SD    | Mean      | Min    | Max    | SD    | Mean      | Min    | Max    | SD    |
| <i>Abies cilicica</i>  | $T_1$ (°C)          | 7.183     | 6.020  | 8.390  | 1.068 | 7.714     | 5.600  | 8.600  | 1.225 | 6.803     | 5.600  | 8.215  | 1.131 |
|                        | $T_2$ (°C)          | 13.209    | 11.079 | 17.847 | 2.699 | 14.790    | 10.530 | 18.680 | 3.551 | 15.088    | 10.566 | 23.404 | 5.661 |
|                        | $M_1$ (v/v)         | 0.033     | 0.006  | 0.053  | 0.021 | 0.049     | 0.002  | 0.093  | 0.038 | 0.041     | 0.003  | 0.073  | 0.030 |
|                        | $M_2$ (v/v)         | 0.296     | 0.145  | 0.427  | 0.121 | 0.249     | 0.140  | 0.356  | 0.077 | 0.312     | 0.102  | 0.458  | 0.174 |
| <i>Abies pinsapo</i>   | $T_1$ (°C)          | 4.724     | 3.974  | 5.868  | 1.006 | 6.221     | 3.002  | 7.922  | 2.789 | 3.411     | 3.163  | 3.742  | 0.299 |
|                        | $T_2$ (°C)          | 13.136    | 11.144 | 14.398 | 1.746 | 15.358    | 12.549 | 18.562 | 3.026 | 13.387    | 11.525 | 15.491 | 1.994 |
|                        | $M_1$ (v/v)         | 0.055     | 0.002  | 0.093  | 0.047 | 0.038     | 0.001  | 0.075  | 0.037 | 0.090     | 0.086  | 0.092  | 0.003 |
|                        | $M_2$ (v/v)         | 0.153     | 0.104  | 0.227  | 0.065 | 0.351     | 0.263  | 0.408  | 0.077 | 0.121     | 0.102  | 0.132  | 0.017 |
| <i>Abies maroccana</i> | $T_1$ (°C)          | 8.005     | -      | -      | -     | 4.861     | -      | -      | -     | 8.666     | -      | -      | -     |
|                        | $T_2$ (°C)          | 11.506    | -      | -      | -     | 11.292    | -      | -      | -     | 17.264    | -      | -      | -     |
|                        | $M_1$ (v/v)         | 0.014     | -      | -      | -     | 0.077     | -      | -      | -     | 0.020     | -      | -      | -     |
|                        | $M_2$ (v/v)         | 0.216     | -      | -      | -     | 0.127     | -      | -      | -     | 0.454     | -      | -      | -     |
| <i>Abies tazaotana</i> | $T_1$ (°C)          | 7.320     | -      | -      | -     | 6.104     | -      | -      | -     | 7.323     | -      | -      | -     |
|                        | $T_2$ (°C)          | 12.394    | -      | -      | -     | 13.017    | -      | -      | -     | 13.123    | -      | -      | -     |
|                        | $M_1$ (v/v)         | 0.007     | -      | -      | -     | 0.010     | -      | -      | -     | 0.032     | -      | -      | -     |
|                        | $M_2$ (v/v)         | 0.136     | -      | -      | -     | 0.205     | -      | -      | -     | 0.100     | -      | -      | -     |

**Table S5.** Climatic characteristics of sampled sites. Climatic characteristics (mean  $\pm$  SD) and trends ( $\tau$ , Pearson correlation coefficient) obtained for the studied *Abies* species considering annual and seasonal mean temperatures (T) and total precipitation (P). Data were obtained using the homogenized and quality-checked CRU TS 3.23 meteorological dataset gridded at a 0.5° spatial resolution for the period 1950–2010 (60).

| Tree species            | Site code      | Mean Annual    |               |                |               | Mean winter    |              |               |                | Mean spring    |              |               |           |
|-------------------------|----------------|----------------|---------------|----------------|---------------|----------------|--------------|---------------|----------------|----------------|--------------|---------------|-----------|
|                         |                | T (°C)         | Trend (T)     | P (mm)         | Trend (P)     | T (°C)         | Trend (T)    | P (mm)        | Trend (P)      | T (°C)         | Trend (T)    | P (mm)        | Trend (P) |
| <i>A. alba</i>          | ROSE           | 15.1 $\pm$ 0.5 | 0.48          | 719 $\pm$ 144  | -0.11         | 7.4 $\pm$ 0.8  | 0.10         | 211 $\pm$ 76  | -0.18          | 13.4 $\pm$ 0.8 | 0.36         | 174 $\pm$ 64  | 0.12      |
|                         | PESC           | 13.3 $\pm$ 0.5 | 0.51          | 754 $\pm$ 145  | -0.10         | 5.7 $\pm$ 0.8  | 0.15         | 212 $\pm$ 77  | -0.17          | 11.6 $\pm$ 0.7 | 0.37         | 173 $\pm$ 65  | 0.11      |
|                         | IANN           | 13.9 $\pm$ 0.5 | 0.51          | 665 $\pm$ 140  | -0.01         | 6.6 $\pm$ 0.8  | 0.10         | 207 $\pm$ 66  | -0.03          | 11.9 $\pm$ 0.8 | 0.41         | 153 $\pm$ 54  | 0.05      |
|                         | CUGN           | 13.8 $\pm$ 0.5 | 0.51          | 665 $\pm$ 140  | -0.01         | 6.7 $\pm$ 0.7  | 0.10         | 207 $\pm$ 66  | -0.03          | 11.9 $\pm$ 0.7 | 0.41         | 153 $\pm$ 54  | 0.05      |
|                         | PANT           | 13.8 $\pm$ 0.5 | 0.51          | 665 $\pm$ 140  | -0.01         | 6.7 $\pm$ 0.7  | 0.10         | 207 $\pm$ 66  | -0.03          | 11.9 $\pm$ 0.7 | 0.41         | 153 $\pm$ 54  | 0.05      |
|                         | GARA           | 17.0 $\pm$ 0.5 | 0.57          | 763 $\pm$ 170  | 0.24          | 10.3 $\pm$ 0.7 | 0.16         | 282 $\pm$ 101 | 0.11           | 14.8 $\pm$ 0.7 | 0.49         | 157 $\pm$ 64  | 0.24      |
|                         | GUAR           | 10.9 $\pm$ 0.7 | 0.68          | 722 $\pm$ 159  | -0.18         | 3.2 $\pm$ 1.1  | 0.37         | 160 $\pm$ 77  | -0.06          | 9.5 $\pm$ 0.9  | 0.41         | 210 $\pm$ 84  | -0.04     |
|                         | PORH           | 6.6 $\pm$ 0.7  | 0.70          | 1029 $\pm$ 191 | -0.19         | -0.7 $\pm$ 1.1 | 0.37         | 247 $\pm$ 102 | -0.10          | 4.9 $\pm$ 0.9  | 0.46         | 292 $\pm$ 103 | 0.01      |
|                         | PORL           | 6.6 $\pm$ 0.7  | 0.70          | 1029 $\pm$ 191 | -0.19         | -0.7 $\pm$ 1.1 | 0.37         | 247 $\pm$ 102 | -0.10          | 4.9 $\pm$ 0.9  | 0.46         | 292 $\pm$ 103 | 0.01      |
|                         | SJPE           | 6.6 $\pm$ 0.7  | 0.70          | 1029 $\pm$ 191 | -0.19         | -0.7 $\pm$ 1.1 | 0.37         | 247 $\pm$ 102 | -0.10          | 4.9 $\pm$ 0.9  | 0.46         | 292 $\pm$ 103 | 0.01      |
| BOUM                    | 9.4 $\pm$ 0.6  | 0.65           | 832 $\pm$ 171 | -0.22          | 2.3 $\pm$ 1.0 | 0.32           | 166 $\pm$ 89 | -0.08         | 7.8 $\pm$ 0.8  | 0.40           | 233 $\pm$ 69 | -0.01         |           |
| MONT                    | 13.4 $\pm$ 0.5 | 0.53           | 692 $\pm$ 170 | -0.19          | 7.1 $\pm$ 0.9 | 0.24           | 133 $\pm$ 76 | 0.06          | 11.4 $\pm$ 0.8 | 0.28           | 189 $\pm$ 81 | -0.08         |           |
| <i>A. borisii-regis</i> | ABRH           | 10.0 $\pm$ 0.5 | 0.30          | 1061 $\pm$ 182 | -0.31         | 1.7 $\pm$ 0.8  | -0.02        | 379 $\pm$ 126 | -0.32          | 8.7 $\pm$ 0.7  | 0.33         | 242 $\pm$ 72  | -0.14     |
|                         | ABRM           | 10.0 $\pm$ 0.5 | 0.30          | 1061 $\pm$ 182 | -0.31         | 1.7 $\pm$ 0.8  | -0.02        | 379 $\pm$ 126 | -0.32          | 8.7 $\pm$ 0.7  | 0.33         | 242 $\pm$ 72  | -0.14     |
|                         | ABRL           | 10.0 $\pm$ 0.5 | 0.30          | 1061 $\pm$ 182 | -0.31         | 1.7 $\pm$ 0.8  | -0.02        | 379 $\pm$ 126 | -0.32          | 8.7 $\pm$ 0.7  | 0.33         | 242 $\pm$ 72  | -0.14     |
|                         | KARP1          | 12.1 $\pm$ 0.5 | 0.34          | 770 $\pm$ 141  | -0.19         | 4.1 $\pm$ 0.7  | -0.07        | 292 $\pm$ 96  | -0.17          | 10.4 $\pm$ 0.8 | 0.34         | 175 $\pm$ 53  | -0.09     |
|                         | PERT           | 10.7 $\pm$ 0.5 | 0.30          | 871 $\pm$ 153  | -0.30         | 2.1 $\pm$ 0.9  | -0.05        | 299 $\pm$ 102 | -0.22          | 9.4 $\pm$ 0.8  | 0.34         | 207 $\pm$ 59  | -0.09     |
| <i>A. cephalonica</i>   | AINO           | 15.9 $\pm$ 0.5 | -0.12         | 688 $\pm$ 125  | -0.10         | 8.9 $\pm$ 0.8  | -0.44        | 283 $\pm$ 84  | -0.06          | 13.8 $\pm$ 0.7 | 0.01         | 143 $\pm$ 43  | 0.02      |
|                         | KARP2          | 12.1 $\pm$ 0.5 | 0.34          | 770 $\pm$ 141  | -0.19         | 4.1 $\pm$ 0.7  | -0.07        | 292 $\pm$ 96  | -0.17          | 10.4 $\pm$ 0.8 | 0.34         | 175 $\pm$ 53  | -0.09     |
|                         | PARN           | 16.2 $\pm$ 0.6 | 0.40          | 529 $\pm$ 118  | -0.05         | 8.5 $\pm$ 0.9  | -0.03        | 224 $\pm$ 86  | 0.01           | 14.0 $\pm$ 0.9 | 0.36         | 113 $\pm$ 47  | -0.07     |
| <i>A. cilicica</i>      | leb2           | 11.8 $\pm$ 0.7 | 0.34          | 647 $\pm$ 171  | -0.20         | 2.9 $\pm$ 1.2  | 0.02         | 367 $\pm$ 123 | -0.25          | 10.3 $\pm$ 0.9 | 0.22         | 160 $\pm$ 65  | -0.16     |
|                         | syr2           | 17.2 $\pm$ 0.6 | 0.25          | 712 $\pm$ 149  | -0.11         | 8.1 $\pm$ 1.2  | -0.02        | 369 $\pm$ 114 | -0.18          | 15.7 $\pm$ 0.8 | 0.22         | 178 $\pm$ 72  | -0.10     |
|                         | tu24           | 13.0 $\pm$ 0.6 | 0.14          | 681 $\pm$ 145  | -0.11         | 4.0 $\pm$ 1.0  | -0.12        | 363 $\pm$ 126 | -0.09          | 11.4 $\pm$ 0.8 | 0.13         | 155 $\pm$ 61  | -0.20     |
|                         | DEAC           | 11.5 $\pm$ 0.6 | 0.06          | 643 $\pm$ 139  | 0.02          | 2.1 $\pm$ 1.2  | -0.19        | 314 $\pm$ 111 | -0.12          | 10.1 $\pm$ 0.9 | 0.06         | 163 $\pm$ 58  | 0.01      |
|                         | IBAC           | 11.5 $\pm$ 0.6 | 0.06          | 643 $\pm$ 139  | 0.02          | 2.1 $\pm$ 1.2  | -0.19        | 314 $\pm$ 111 | -0.12          | 10.1 $\pm$ 0.9 | 0.06         | 163 $\pm$ 58  | 0.01      |
| <i>A. pinsapo</i>       | APSB           | 17.7 $\pm$ 0.4 | 0.43          | 628 $\pm$ 231  | 0.03          | 12.6 $\pm$ 0.7 | 0.39         | 283 $\pm$ 163 | 0.04           | 15.9 $\pm$ 0.7 | 0.22         | 157 $\pm$ 75  | -0.17     |
|                         | APSG           | 15.7 $\pm$ 0.5 | 0.56          | 612 $\pm$ 202  | -0.04         | 9.5 $\pm$ 0.7  | 0.41         | 257 $\pm$ 149 | -0.12          | 13.9 $\pm$ 0.7 | 0.34         | 165 $\pm$ 72  | -0.29     |
|                         | APSN           | 15.7 $\pm$ 0.5 | 0.56          | 612 $\pm$ 202  | -0.04         | 9.5 $\pm$ 0.7  | 0.41         | 257 $\pm$ 149 | -0.12          | 13.9 $\pm$ 0.7 | 0.34         | 165 $\pm$ 72  | -0.29     |
| <i>A. maroccana</i>     | ABMC           | 15.1 $\pm$ 0.4 | 0.37          | 638 $\pm$ 204  | -0.01         | 9.5 $\pm$ 0.7  | 0.23         | 276 $\pm$ 142 | -0.06          | 13.1 $\pm$ 0.7 | 0.21         | 170 $\pm$ 76  | -0.18     |
| <i>A. tazaotana</i>     | ABTZ           | 15.1 $\pm$ 0.4 | 0.37          | 638 $\pm$ 204  | -0.01         | 9.5 $\pm$ 0.7  | 0.23         | 276 $\pm$ 142 | -0.06          | 13.1 $\pm$ 0.7 | 0.21         | 170 $\pm$ 76  | -0.18     |

**Table S5.** Continued

| Tree species            | Site code  | Mean summer |                  |          |                  | Mean autumn |                  |           |                  |
|-------------------------|------------|-------------|------------------|----------|------------------|-------------|------------------|-----------|------------------|
|                         |            | T (°C)      | <i>Trend</i> (T) | P (mm)   | <i>Trend</i> (P) | T (°C)      | <i>Trend</i> (T) | P (mm)    | <i>Trend</i> (P) |
| <i>A. alba</i>          | ROSE       | 23.2 ± 0.9  | 0.43             | 113 ± 55 | -0.01            | 16.2 ± 0.8  | 0.22             | 221 ± 73  | -0.10            |
|                         | PESC       | 21.4 ± 0.9  | 0.45             | 126 ± 61 | -0.03            | 14.5 ± 0.8  | 0.25             | 242 ± 86  | -0.05            |
|                         | IANN       | 21.8 ± 0.9  | 0.48             | 82 ± 42  | 0.04             | 15.1 ± 0.7  | 0.23             | 224 ± 83  | -0.01            |
|                         | CUGN       | 21.8 ± 0.9  | 0.48             | 82 ± 42  | 0.04             | 15.7 ± 0.8  | 0.23             | 224 ± 83  | -0.01            |
|                         | PANT       | 21.8 ± 0.9  | 0.48             | 82 ± 42  | 0.04             | 15.7 ± 0.8  | 0.23             | 224 ± 83  | -0.01            |
|                         | GARA       | 24.5 ± 0.8  | 0.51             | 50 ± 34  | 0.05             | 18.4 ± 0.7  | 0.30             | 274 ± 121 | 0.13             |
|                         | GUAR       | 19.4 ± 1.0  | 0.66             | 159 ± 67 | -0.28            | 11.8 ± 0.8  | 0.47             | 192 ± 91  | 0.01             |
|                         | PORH       | 14.7 ± 1.1  | 0.67             | 227 ± 86 | -0.32            | 7.7 ± 0.8   | 0.50             | 263 ± 108 | 0.03             |
|                         | PORL       | 14.7 ± 1.1  | 0.67             | 227 ± 86 | -0.32            | 7.7 ± 0.8   | 0.50             | 263 ± 108 | 0.03             |
|                         | SJPE       | 14.7 ± 1.1  | 0.67             | 227 ± 86 | -0.32            | 7.7 ± 0.8   | 0.50             | 263 ± 108 | 0.03             |
|                         | BOUM       | 17.3 ± 1.0  | 0.57             | 209 ± 78 | -0.34            | 10.4 ± 0.8  | 0.46             | 224 ± 80  | 0.01             |
| MONT                    | 20.7 ± 0.9 | 0.45        | 161 ± 66         | -0.23    | 14.5 ± 0.7       | 0.38        | 209 ± 86         | -0.17     |                  |
| <i>A. borisii-regis</i> | ABRH       | 18.7 ± 0.9  | 0.30             | 119 ± 72 | 0.14             | 11.0 ± 0.8  | 0.09             | 320 ± 96  | -0.14            |
|                         | ABRM       | 18.7 ± 0.9  | 0.30             | 119 ± 72 | 0.14             | 11.0 ± 0.8  | 0.09             | 320 ± 96  | -0.14            |
|                         | ABRL       | 18.7 ± 0.9  | 0.30             | 119 ± 72 | 0.14             | 11.0 ± 0.8  | 0.09             | 320 ± 96  | -0.14            |
|                         | KARP1      | 20.8 ± 0.9  | 0.43             | 66 ± 39  | 0.03             | 13.2 ± 0.7  | 0.14             | 238 ± 81  | -0.05            |
|                         | PERT       | 19.7 ± 0.9  | 0.33             | 106 ± 56 | 0.05             | 11.6 ± 0.8  | 0.10             | 258 ± 83  | -0.22            |
| <i>A. cephalonica</i>   | AINO       | 23.8 ± 0.8  | 0.35             | 36 ± 26  | 0.20             | 17.3 ± 0.7  | -0.26            | 226 ± 77  | -0.14            |
|                         | KARP2      | 20.8 ± 0.9  | 0.43             | 66 ± 39  | 0.03             | 13.2 ± 0.7  | 0.14             | 238 ± 81  | -0.05            |
|                         | PARN       | 24.9 ± 1.0  | 0.51             | 30 ± 24  | -0.03            | 17.3 ± 0.9  | 0.20             | 172 ± 78  | 0.01             |
| <i>A. cilicica</i>      | leb2       | 19.8 ± 0.8  | 0.46             | 4 ± 8    | 0.02             | 14.1 ± 0.8  | 0.31             | 117 ± 56  | 0.09             |
|                         | syr2       | 25.5 ± 0.7  | 0.38             | 18 ± 22  | 0.06             | 19.4 ± 0.9  | 0.19             | 147 ± 57  | 0.14             |
|                         | tu24       | 22.2 ± 0.7  | 0.37             | 29 ± 24  | 0.15             | 14.6 ± 0.9  | 0.08             | 133 ± 68  | 0.01             |
|                         | DEAC       | 21.0 ± 0.7  | 0.37             | 41 ± 27  | 0.03             | 12.9 ± 0.9  | 0.02             | 127 ± 63  | 0.18             |
|                         | IBAC       | 21.0 ± 0.7  | 0.37             | 41 ± 27  | 0.03             | 12.9 ± 0.9  | 0.02             | 127 ± 63  | 0.18             |
| <i>A. pinsapo</i>       | APSB       | 23.2 ± 0.6  | 0.40             | 17 ± 16  | -0.10            | 18.9 ± 0.7  | 0.15             | 169 ± 95  | 0.10             |
|                         | APSG       | 22.7 ± 0.7  | 0.53             | 26 ± 22  | -0.19            | 16.9 ± 0.8  | 0.24             | 161 ± 83  | 0.09             |
|                         | APSN       | 22.7 ± 0.7  | 0.53             | 26 ± 22  | -0.19            | 16.9 ± 0.8  | 0.24             | 161 ± 83  | 0.09             |
| <i>A. maroccana</i>     | ABMC       | 21.5 ± 0.6  | 0.35             | 27 ± 23  | -0.04            | 16.4 ± 0.7  | 0.11             | 165 ± 82  | 0.23             |
| <i>A. tazaotana</i>     | ABTZ       | 21.5 ± 0.6  | 0.35             | 27 ± 23  | -0.04            | 16.4 ± 0.7  | 0.11             | 165 ± 82  | 0.23             |



**Table S6.** Summary of the Generalized Least Squares regressions model. We used it to forecast site chronologies of tree-ring width indices (TRWi<sub>p</sub>). Abbreviations: wi, winter; au, autumn; sp, spring; su, summer. Numbers after climate variables indicate months, whereas the subscript “p” indicates the previous year.

| Tree species            | Site code | R <sup>2</sup> (adj) | Equation                                                                                                                                                                                                                                                                                                |
|-------------------------|-----------|----------------------|---------------------------------------------------------------------------------------------------------------------------------------------------------------------------------------------------------------------------------------------------------------------------------------------------------|
| <i>A. alba</i>          | ROSE      | 0.74                 | 1.29-0.05t <sub>1</sub> +0.03t <sub>2</sub> -0.03t <sub>6</sub> -0.04t <sub>10p</sub> +0.09p <sub>wi</sub> +0.04p <sub>sp</sub> +0.15e <sub>9</sub> +0.24e <sub>27</sub> +0.05e <sub>21p</sub>                                                                                                          |
|                         | PESC      | 0.84                 | 1.26-0.07t <sub>1</sub> -0.02t <sub>10p</sub> -0.15p <sub>wi</sub> -0.08p <sub>sp</sub> +0.03p <sub>sup</sub> +0.04p <sub>aup</sub> -0.14e <sub>1</sub> -0.09e <sub>5</sub> -0.13e <sub>21</sub> +0.19e <sub>27</sub> +0.06e <sub>16p</sub> +0.04e <sub>24p</sub>                                       |
|                         | IANN      | 0.70                 | 0.99-0.05t <sub>10</sub> +0.07t <sub>sp</sub> -0.04t <sub>10p</sub> +0.07p <sub>5</sub> +0.05p <sub>su</sub> -0.04e <sub>17</sub> +0.06e <sub>25</sub> +0.09e <sub>24p</sub>                                                                                                                            |
|                         | CUGN      | 0.73                 | 0.95+0.05t <sub>4</sub> -0.05t <sub>8</sub> -0.05t <sub>9p</sub> -0.10p <sub>1</sub> +0.05p <sub>5</sub> -0.07e <sub>5</sub> -0.22e <sub>8</sub> +0.23e <sub>22</sub> +0.06e <sub>24</sub> +0.36e <sub>9p</sub> +0.21e <sub>24p</sub>                                                                   |
|                         | PANT      | 0.75                 | 0.97-0.04t <sub>10</sub> -0.06t <sub>10p</sub> -0.02p <sub>2</sub> +0.05p <sub>sup</sub> -0.08e <sub>3p</sub> +0.07e <sub>5p</sub> -0.05e <sub>15p</sub> +0.10e <sub>24p</sub>                                                                                                                          |
|                         | GARA      | 0.77                 | 1.00+0.03t <sub>3</sub> -0.03p <sub>1</sub> -0.04p <sub>10</sub> -0.03e <sub>3</sub> -0.02e <sub>16</sub> -0.04e <sub>17</sub> +0.10e <sub>26</sub> -0.03e <sub>18p</sub> +0.06e <sub>20p</sub>                                                                                                         |
|                         | GUAR      | 0.88                 | 0.94-0.04t <sub>1</sub> +0.07t <sub>2</sub> +0.03t <sub>15</sub> +0.03t <sub>11p</sub> -0.03p <sub>9</sub> +0.06p <sub>au</sub> +0.10e <sub>8</sub> -0.12e <sub>16</sub> +0.04e <sub>18p</sub> +0.05e <sub>25p</sub>                                                                                    |
|                         | PORH      | 0.69                 | 0.92-0.07t <sub>1</sub> +0.06t <sub>2</sub> +0.02t <sub>3</sub> -0.08t <sub>10</sub> +0.08t <sub>11p</sub> -0.05t <sub>aup</sub> +0.06p <sub>4</sub> +0.03p <sub>su</sub> -0.11e <sub>8p</sub> +0.01e <sub>18p</sub>                                                                                    |
|                         | PORL      | 0.55                 | 0.95-0.04t <sub>1</sub> +0.06t <sub>2</sub> +0.03t <sub>7</sub> -0.02t <sub>8</sub> -0.02t <sub>9p</sub> -0.06t <sub>aup</sub> +0.04p <sub>6</sub> -0.09e <sub>5</sub> +0.04e <sub>18</sub> +0.01e <sub>21p</sub>                                                                                       |
|                         | SIPE      | 0.56                 | 0.66+0.05t <sub>2</sub> +0.03t <sub>5</sub> +0.04t <sub>11p</sub> -0.06t <sub>aup</sub> +0.05p <sub>su</sub> -0.30e <sub>2</sub> +0.22e <sub>6</sub> -0.85e <sub>14</sub> -0.13e <sub>23</sub> -0.31e <sub>3p</sub> -0.09e <sub>8p</sub>                                                                |
|                         | BOUM      | 0.73                 | 1.09+0.03t <sub>6</sub> -0.03t <sub>10</sub> +0.08t <sub>sp</sub> -0.04t <sub>9p</sub> +0.02p <sub>8</sub> +0.01p <sub>aup</sub> -0.92e <sub>2</sub> +1.16e <sub>13</sub> -0.11e <sub>23</sub> -0.29e <sub>8p</sub> +0.06e <sub>17p</sub>                                                               |
|                         | MONT      | 0.64                 | 1.36+0.04t <sub>4</sub> -0.02t <sub>sp</sub> -0.01t <sub>9p</sub> +0.03t <sub>12p</sub> +0.06p <sub>2</sub> -0.03p <sub>10</sub> +0.03p <sub>sup</sub> -0.07e <sub>2</sub> +0.97e <sub>13</sub> +0.14e <sub>15</sub> -0.34e <sub>6p</sub>                                                               |
| <i>A. borisii-regis</i> | ABRH      | 0.48                 | 1.09+0.03t <sub>4</sub> -0.02t <sub>9</sub> -0.04t <sub>su</sub> -0.03t <sub>9p</sub> +0.02p <sub>7</sub> +0.17e <sub>7p</sub> -0.05e <sub>18p</sub> +0.03e <sub>21p</sub>                                                                                                                              |
|                         | ABRM      | 0.32                 | 0.91+0.09p <sub>su</sub> +0.02p <sub>11p</sub> +0.03p <sub>sup</sub> -0.13e <sub>7</sub>                                                                                                                                                                                                                |
|                         | ABRL      | 0.57                 | 0.97-0.02t <sub>10</sub> +0.06t <sub>12p</sub> -0.07t <sub>aup</sub> +0.04p <sub>5</sub> +0.04p <sub>7</sub> -0.02e <sub>16</sub> -0.05e <sub>23</sub> +0.17e <sub>8p</sub> -0.18e <sub>15p</sub> -0.05e <sub>18p</sub> +0.07e <sub>24p</sub>                                                           |
|                         | KARP1     | 0.33                 | 0.98-0.03p <sub>4</sub> +0.05p <sub>6</sub> -0.03e <sub>19</sub> +0.01e <sub>25p</sub>                                                                                                                                                                                                                  |
|                         | PERT      | 0.76                 | 0.89+0.03t <sub>3</sub> -0.04t <sub>10p</sub> +0.07p <sub>5</sub> +0.05p <sub>su</sub> +0.03p <sub>9p</sub> -0.43e <sub>9</sub> -0.04e <sub>16</sub> -0.52e <sub>2p</sub> -0.08e <sub>5p</sub> -0.26e <sub>10p</sub> -0.08e <sub>23p</sub>                                                              |
| <i>A. cephalonica</i>   | AINO      | 0.81                 | 0.98-0.04t <sub>wi</sub> -0.06p <sub>3</sub> +0.04p <sub>6</sub> -0.02p <sub>sup</sub> -0.05e <sub>3</sub> +0.03e <sub>5</sub> -0.14e <sub>17</sub> +0.18e <sub>26</sub> -0.07e <sub>16p</sub> -0.04e <sub>17p</sub> +0.09e <sub>23p</sub> +0.11e <sub>27p</sub>                                        |
|                         | KARP2     | 0.52                 | 0.92+0.02t <sub>9</sub> -0.02p <sub>4</sub> +0.06p <sub>6</sub> -0.16e <sub>9</sub> +0.04e <sub>18</sub> -0.08e <sub>19</sub> -0.08e <sub>11p</sub> -0.02e <sub>15p</sub> +0.04e <sub>24p</sub>                                                                                                         |
|                         | PARN      | 0.77                 | 1.06-0.05t <sub>6</sub> -0.02t <sub>11p</sub> +0.02p <sub>2</sub> +0.02p <sub>6</sub> -0.02p <sub>12p</sub> -0.47e <sub>13</sub> -0.09e <sub>20</sub> +0.05e <sub>24</sub> +0.08e <sub>26</sub> +0.42e <sub>2p</sub> -0.14e <sub>5p</sub> +0.08e <sub>24p</sub>                                         |
| <i>A. cilicica</i>      | leb2      | 0.85                 | 0.92-0.02t <sub>3</sub> +0.04t <sub>7</sub> -0.06t <sub>wi</sub> +0.03p <sub>sp</sub> -0.13p <sub>11p</sub> +0.10p <sub>aup</sub> -0.12e <sub>16</sub> +0.04e <sub>20</sub> +0.07e <sub>24</sub> -0.05e <sub>15p</sub>                                                                                  |
|                         | syr2      | 0.57                 | 0.92-0.07p <sub>10</sub> -0.02p <sub>12p</sub> +0.18e <sub>5</sub> -0.55e <sub>6</sub> +0.01e <sub>21</sub> +0.04e <sub>25</sub> +0.10e <sub>27</sub> -0.27e <sub>15p</sub>                                                                                                                             |
|                         | tu24      | 0.62                 | 1.10+0.03t <sub>4</sub> -0.04t <sub>aup</sub> +0.05p <sub>8</sub> +0.01p <sub>au</sub> -0.06p <sub>11p</sub> -0.18e <sub>1</sub> -0.07e <sub>3</sub> -0.07e <sub>19</sub> -0.09e <sub>24</sub> +0.13e <sub>26</sub> +0.17e <sub>7p</sub>                                                                |
|                         | DEAC      | 0.65                 | 1.18-0.04t <sub>9p</sub> +0.08t <sub>12p</sub> +0.08p <sub>1</sub> +0.06p <sub>5</sub> -0.08e <sub>16</sub> -0.07e <sub>18</sub> +0.05e <sub>19</sub> -0.07e <sub>5p</sub> -0.47e <sub>14p</sub> -0.11e <sub>23p</sub>                                                                                  |
|                         | IBAC      | 0.60                 | 1.03+0.05t <sub>4</sub> -0.05t <sub>9p</sub> +0.06p <sub>5</sub> +0.04p <sub>7</sub> +0.08e <sub>26</sub> +0.16e <sub>27</sub> -0.24e <sub>22p</sub> +0.12e <sub>24p</sub>                                                                                                                              |
| <i>A. pinsapo</i>       | APSB      | 0.54                 | 1.23-0.04t <sub>5</sub> -0.06t <sub>6</sub> +0.06p <sub>7</sub> -0.05p <sub>8</sub> +0.06p <sub>10p</sub> -0.22e <sub>23</sub> +0.73e <sub>14p</sub> +0.19e <sub>18p</sub> -0.11e <sub>19p</sub> -0.13e <sub>23p</sub>                                                                                  |
|                         | APSG      | 0.89                 | 1.02-0.03t <sub>5</sub> -0.03t <sub>8</sub> -0.02t <sub>11p</sub> +0.03p <sub>4</sub> +0.04p <sub>aup</sub> -0.43e <sub>2</sub> -0.04e <sub>3</sub> +0.06e <sub>5</sub> -0.18e <sub>10</sub> +0.05e <sub>17</sub> -0.06e <sub>19</sub> +0.11e <sub>24</sub> -0.11e <sub>15p</sub> -0.06e <sub>16p</sub> |
|                         | APSN      | 0.77                 | 1.06-0.04t <sub>3</sub> -0.03t <sub>10p</sub> -0.03p <sub>2</sub> +0.09p <sub>sp</sub> +0.07p <sub>9p</sub> -0.61e <sub>2</sub> +0.17e <sub>6</sub> -0.23e <sub>7</sub> -0.10e <sub>20</sub> -0.08e <sub>23</sub> +0.13e <sub>24</sub> +0.48e <sub>9p</sub> -0.13e <sub>16p</sub>                       |
| <i>A. maroccana</i>     | ABMC      | 0.58                 | 0.97-0.05t <sub>aup</sub> +0.01e <sub>24</sub> +0.03e <sub>25</sub> -0.05e <sub>1p</sub> +0.05e <sub>19p</sub> -0.08e <sub>21p</sub> -0.09e <sub>23p</sub>                                                                                                                                              |
| <i>A. tazaotana</i>     | ABTZ      | 0.57                 | 0.93+0.04t <sub>2</sub> +0.06t <sub>4</sub> +0.04t <sub>7</sub> +0.03p <sub>4</sub> +0.04p <sub>su</sub> +0.05p <sub>10p</sub> +0.03p <sub>sup</sub> -0.06e <sub>17</sub> +0.10e <sub>18</sub> -0.08e <sub>23p</sub>                                                                                    |

**Table S7.** Statistics of the Bayesian estimation of the site-by-site tuned VS-Lite growth response parameters ( $T_1$ ,  $T_2$ ,  $M_1$ , and  $M_2$ ) considering two 21st century periods; and the two IPCC AR5 emission scenarios (RCP 4.5 and RCP 8.5). Different letters indicate significant ( $P < 0.05$ ) differences between periods based on Tukey HSD post-hoc tests.

|                          |                     | IPCC emission scenarios |        |        |       |           |        |        |       |           |        |        |       |           |        |        |       |
|--------------------------|---------------------|-------------------------|--------|--------|-------|-----------|--------|--------|-------|-----------|--------|--------|-------|-----------|--------|--------|-------|
|                          |                     | RCP 4.5                 |        |        |       |           |        |        |       | RCP 8.5   |        |        |       |           |        |        |       |
| Tree species-<br>country | Parameter<br>(unit) | 2010-2049               |        |        |       | 2050-2100 |        |        |       | 2010-2049 |        |        |       | 2050-2100 |        |        |       |
|                          |                     | Mean                    | Min    | Max    | SD    | Mean      | Min    | Max    | SD    | Mean      | Min    | Max    | SD    | Mean      | Min    | Max    | SD    |
| <i>Abies alba</i> -Italy | $T_1$ (°C)          | 4.501b                  | 3.261  | 6.892  | 1.340 | 5.896a    | 3.687  | 8.581  | 1.657 | 4.067b    | 3.072  | 5.525  | 0.873 | 5.358a    | 4.632  | 6.584  | 0.719 |
|                          | $T_2$ (°C)          | 10.869b                 | 10.249 | 12.008 | 0.625 | 15.022a   | 11.294 | 21.247 | 4.121 | 14.957a   | 10.635 | 22.833 | 4.665 | 13.188b   | 10.763 | 21.719 | 4.374 |
|                          | $M_1$ (v/v)         | 0.058a                  | 0.011  | 0.086  | 0.031 | 0.037b    | 0.02   | 0.084  | 0.027 | 0.052a    | 0.022  | 0.085  | 0.023 | 0.028b    | 0.000  | 0.061  | 0.026 |
|                          | $M_2$ (v/v)         | 0.214                   | 0.124  | 0.264  | 0.047 | 0.244     | 0.126  | 0.371  | 0.098 | 0.233a    | 0.148  | 0.322  | 0.076 | 0.149b    | 0.103  | 0.173  | 0.030 |
| <i>Abies alba</i> -Spain | $T_1$ (°C)          | 3.154b                  | 2.318  | 4.246  | 0.176 | 4.707a    | 2.881  | 6.156  | 1.308 | 3.407     | 1.908  | 6.671  | 1.940 | 3.491     | 2.133  | 6.868  | 1.845 |
|                          | $T_2$ (°C)          | 12.850b                 | 10.388 | 23.426 | 5.192 | 13.703a   | 10.538 | 22.481 | 4.564 | 13.905b   | 10.917 | 22.995 | 4.569 | 14.598a   | 10.209 | 23.608 | 4.996 |
|                          | $M_1$ (v/v)         | 0.043b                  | 0.002  | 0.078  | 0.033 | 0.056a    | 0.017  | 0.078  | 0.029 | 0.057b    | 0.002  | 0.082  | 0.030 | 0.070a    | 0.007  | 0.095  | 0.032 |
|                          | $M_2$ (v/v)         | 0.279                   | 0.100  | 0.366  | 0.126 | 0.280     | 0.161  | 0.357  | 0.094 | 0.280     | 0.107  | 0.378  | 0.113 | 0.230     | 0.110  | 0.305  | 0.091 |
| <i>A. borisii-regis</i>  | $T_1$ (°C)          | 6.662                   | 3.148  | 8.581  | 2.150 | 6.843     | 5.258  | 8.238  | 1.257 | 5.359     | 2.152  | 8.626  | 2.989 | 5.329     | 1.628  | 7.277  | 2.362 |
|                          | $T_2$ (°C)          | 14.852a                 | 10.237 | 23.108 | 6.067 | 13.656b   | 10.236 | 22.484 | 4.997 | 13.704b   | 10.420 | 23.419 | 5.531 | 12.416a   | 10.322 | 18.197 | 3.336 |
|                          | $M_1$ (v/v)         | 0.042b                  | 0.013  | 0.075  | 0.026 | 0.055a    | 0.018  | 0.097  | 0.039 | 0.077     | 0.015  | 0.094  | 0.035 | 0.065     | 0.017  | 0.097  | 0.033 |
|                          | $M_2$ (v/v)         | 0.354a                  | 0.313  | 0.381  | 0.030 | 0.277b    | 0.190  | 0.355  | 0.081 | 0.331a    | 0.307  | 0.363  | 0.027 | 0.287b    | 0.155  | 0.480  | 0.138 |
| <i>A. cephalonica</i>    | $T_1$ (°C)          | 4.623b                  | 3.353  | 6.738  | 1.844 | 6.031a    | 3.428  | 7.403  | 2.255 | 5.617a    | 4.306  | 7.240  | 1.492 | 5.310b    | 3.511  | 7.541  | 2.050 |
|                          | $T_2$ (°C)          | 11.412                  | 10.965 | 12.084 | 0.593 | 11.261    | 10.465 | 12.555 | 1.131 | 11.549b   | 10.440 | 13.269 | 1.511 | 13.177a   | 10.465 | 18.022 | 4.205 |
|                          | $M_1$ (v/v)         | 0.051a                  | 0.028  | 0.080  | 0.027 | 0.030b    | 0.007  | 0.074  | 0.038 | 0.077a    | 0.064  | 0.091  | 0.013 | 0.034b    | 0.001  | 0.064  | 0.032 |
|                          | $M_2$ (v/v)         | 0.392a                  | 0.310  | 0.440  | 0.072 | 0.265b    | 0.214  | 0.298  | 0.045 | 0.225a    | 0.183  | 0.305  | 0.069 | 0.171b    | 0.103  | 0.215  | 0.060 |

**Table S7.** continued.

|                     |                     | IPCC emission scenarios |        |        |       |           |        |        |       |           |        |        |       |           |        |        |       |
|---------------------|---------------------|-------------------------|--------|--------|-------|-----------|--------|--------|-------|-----------|--------|--------|-------|-----------|--------|--------|-------|
|                     |                     | RCP 4.5                 |        |        |       |           |        |        |       | RCP 8.5   |        |        |       |           |        |        |       |
| Tree species        | Parameter<br>(unit) | 2010-2049               |        |        |       | 2050-2100 |        |        |       | 2010-2049 |        |        |       | 2050-2100 |        |        |       |
|                     |                     | Mean                    | Min    | Max    | SD    | Mean      | Min    | Max    | SD    | Mean      | Min    | Max    | SD    | Mean      | Min    | Max    | SD    |
| <i>A. cilicica</i>  | $T_1$ (°C)          | 5.737b                  | 4.489  | 6.088  | 0.699 | 6.769a    | 4.633  | 8.675  | 1.841 | 6.058b    | 4.437  | 7.277  | 1.089 | 6.806a    | 3.699  | 8.163  | 1.770 |
|                     | $T_2$ (°C)          | 16.134a                 | 11.065 | 22.237 | 4.361 | 15.092b   | 10.993 | 19.858 | 3.315 | 16.198b   | 13.159 | 20.680 | 2.797 | 19.652a   | 12.635 | 23.109 | 4.219 |
|                     | $M_1$ (v/v)         | 0.053a                  | 0.005  | 0.089  | 0.037 | 0.030b    | 0.001  | 0.077  | 0.034 | 0.048a    | 0.008  | 0.096  | 0.038 | 0.027b    | 0.001  | 0.067  | 0.032 |
|                     | $M_2$ (v/v)         | 0.106b                  | 0.101  | 0.111  | 0.004 | 0.157a    | 0.102  | 0.348  | 0.107 | 0.119     | 0.101  | 0.164  | 0.026 | 0.125     | 0.100  | 0.175  | 0.034 |
| <i>A. pinsapo</i>   | $T_1$ (°C)          | 6.690                   | 6.223  | 6.973  | 0.407 | 6.720     | 5.851  | 7.172  | 0.753 | 6.243b    | 5.531  | 7.295  | 0.930 | 6.965a    | 6.183  | 7.885  | 0.859 |
|                     | $T_2$ (°C)          | 13.312b                 | 13.279 | 21.221 | 4.291 | 15.878a   | 12.686 | 21.894 | 5.213 | 18.134b   | 13.000 | 20.739 | 4.446 | 18.510a   | 14.007 | 22.639 | 4.328 |
|                     | $M_1$ (v/v)         | 0.032                   | 0.003  | 0.059  | 0.028 | 0.038     | 0.001  | 0.093  | 0.049 | 0.030b    | 0.004  | 0.082  | 0.045 | 0.058a    | 0.010  | 0.093  | 0.043 |
|                     | $M_2$ (v/v)         | 0.216a                  | 0.104  | 0.339  | 0.118 | 0.110b    | 0.100  | 0.121  | 0.011 | 0.145a    | 0.101  | 0.168  | 0.038 | 0.117b    | 0.106  | 0.130  | 0.012 |
| <i>A. maroccana</i> | $T_1$ (°C)          | 7.001a                  | –      | –      | –     | 4.135b    | –      | –      | –     | 5.303b    | –      | –      | –     | 5.928a    | –      | –      | –     |
|                     | $T_2$ (°C)          | 12.865                  | –      | –      | –     | 12.518    | –      | –      | –     | 11.855b   | –      | –      | –     | 21.294a   | –      | –      | –     |
|                     | $M_1$ (v/v)         | 0.069a                  | –      | –      | –     | 0.048b    | –      | –      | –     | 0.095     | –      | –      | –     | 0.090     | –      | –      | –     |
|                     | $M_2$ (v/v)         | 0.199a                  | –      | –      | –     | 0.100b    | –      | –      | –     | 0.131     | –      | –      | –     | 0.111     | –      | –      | –     |
| <i>A. tazaotana</i> | $T_1$ (°C)          | 3.626b                  | –      | –      | –     | 7.099a    | –      | –      | –     | 7.603a    | –      | –      | –     | 4.648b    | –      | –      | –     |
|                     | $T_2$ (°C)          | 11.732b                 | –      | –      | –     | 17.522a   | –      | –      | –     | 15.472a   | –      | –      | –     | 12.685b   | –      | –      | –     |
|                     | $M_1$ (v/v)         | 0.004b                  | –      | –      | –     | 0.035a    | –      | –      | –     | 0.012b    | –      | –      | –     | 0.090a    | –      | –      | –     |
|                     | $M_2$ (v/v)         | 0.170a                  | –      | –      | –     | 0.128b    | –      | –      | –     | 0.352a    | –      | –      | –     | 0.101b    | –      | –      | –     |

**Table S8.** Extreme Climate Indices (for details see [http://etccdi.pacificclimate.org/list\\_27\\_indices.shtml](http://etccdi.pacificclimate.org/list_27_indices.shtml)).

| Code | ID                  | Indicator Name                          | Indicator Definitions                                                                                                                                                                                                                                             | Units  |
|------|---------------------|-----------------------------------------|-------------------------------------------------------------------------------------------------------------------------------------------------------------------------------------------------------------------------------------------------------------------|--------|
| 1    | FD                  | Frost days                              | Annual count when daily minimum temperature <0 °C                                                                                                                                                                                                                 | days   |
| 2    | SU                  | Summer days                             | Annual count when daily max temperature >25 °C                                                                                                                                                                                                                    | days   |
| 3    | ID                  | Ice days                                | Annual count when daily maximum temperature <0 °C                                                                                                                                                                                                                 | days   |
| 4    | TN                  | Tropical nights                         | Annual count when daily minimum temperature > 20 °C                                                                                                                                                                                                               | days   |
| 5    | GSL                 | Growing season length                   | Annual (1st Jan to 31st Dec in NH, 1st July to 30th June in SH) count between first span of at least 6 days with TG >5 °C and first span after 1 <sup>st</sup> July (1 <sup>st</sup> January in SH) of 6 days with TG < 5 °C (where TG is daily mean temperature) | days   |
| 6    | TX <sub>x</sub>     | Hottest day                             | Monthly maximum value of daily max temperature                                                                                                                                                                                                                    | °C     |
| 7    | TN <sub>x</sub>     | Warmest night                           | Monthly maximum value of daily min temperature                                                                                                                                                                                                                    | °C     |
| 8    | TX <sub>n</sub>     | Coldest day                             | Monthly minimum value of daily max temperature                                                                                                                                                                                                                    | °C     |
| 9    | TN <sub>n</sub>     | Coldest night                           | Monthly minimum value of daily min temperature                                                                                                                                                                                                                    | °C     |
| 10   | TN <sub>10p</sub>   | Cool nights                             | Percentage of time when daily min temperature < 10 <sup>th</sup> percentile                                                                                                                                                                                       | %      |
| 11   | TX <sub>10p</sub>   | Cool days                               | Percentage of time when daily max temperature < 10 <sup>th</sup> percentile                                                                                                                                                                                       | %      |
| 12   | TN <sub>90p</sub>   | Warm nights                             | Percentage of time when daily min temperature > 90 <sup>th</sup> percentile                                                                                                                                                                                       | %      |
| 13   | TX <sub>90p</sub>   | Warm days                               | Percentage of time when daily max temperature > 90 <sup>th</sup> percentile                                                                                                                                                                                       | %      |
| 14   | WSDI                | Warm spell duration index               | Annual count when at least six consecutive days of max temperature >90 <sup>th</sup> percentile                                                                                                                                                                   | days   |
| 15   | CSDI                | Cold spell duration index               | Annual count when at least six consecutive days of min temperature < 10 <sup>th</sup> percentile                                                                                                                                                                  | days   |
| 16   | DTR                 | Diurnal temperature range               | Monthly mean difference between daily max and min temperature                                                                                                                                                                                                     | °C     |
| 17   | R <sub>x1day</sub>  | Max 1 day precipitation amount          | Monthly maximum 1 day precipitation                                                                                                                                                                                                                               | mm     |
| 18   | R <sub>x5day</sub>  | Max 5 day precipitation amount          | Monthly maximum consecutive 5 days precipitation                                                                                                                                                                                                                  | mm     |
| 19   | SDII                | Simple daily intensity index            | Ratio of annual total precipitation to the number of wet days (≥ 1 mm)                                                                                                                                                                                            | mm/day |
| 20   | R <sub>10mm</sub>   | Number of heavy precipitation days      | Annual count when precipitation ≥10 mm                                                                                                                                                                                                                            | days   |
| 21   | R <sub>20mm</sub>   | Number of very heavy precipitation days | Annual count when precipitation ≥ 20 mm                                                                                                                                                                                                                           | days   |
| 22   | R <sub>1mm</sub>    | Number of precipitation days            | Annual count when precipitation ≥ 1 mm                                                                                                                                                                                                                            | days   |
| 23   | CDD                 | Consecutive dry days                    | Maximum number of consecutive days when precipitation < 1 mm                                                                                                                                                                                                      | days   |
| 24   | CWD                 | Consecutive wet days                    | Maximum number of consecutive days when precipitation ≥1mm                                                                                                                                                                                                        | days   |
| 25   | R <sub>95p</sub>    | Very wet days                           | Annual total precipitation from days > 95 <sup>th</sup> percentile                                                                                                                                                                                                | mm     |
| 26   | R <sub>99p</sub>    | Extremely wet days                      | Annual total precipitation from days > 99 <sup>th</sup> percentile                                                                                                                                                                                                | mm     |
| 27   | PRC <sub>PTOT</sub> | Annual total wet day precipitation      | Annual total precipitation from days ≥ 1 mm                                                                                                                                                                                                                       | mm     |

**Table S9.** Spearman ( $r_s$ ) correlation coefficients (see color legend) calculated between indexed ring-width chronologies (TRWi) and current (A) and previous (B) annual Extreme Climate Indices (see *SI Appendix*, Table S8 for indices codes) considering the studied Mediterranean fir species (ABAL, *A. alba*; ABBR, *A. borisii-regis*; ABCE, *A. cephalonica*; ABCI, *A. cilicica*; ABPI, *A. pinsapo*; ABMC, *A. maroccana*; ABTZ, *A. tzaotana*). Crosses indicate significant correlations ( $P < 0.05$ ).

| (A)  |       | Extreme Climate Indices* |    |    |    |    |    |    |    |    |     |     |     |     |     |     |     |     |     |     |     |     |     |     |     |     |     |     | Legend              |
|------|-------|--------------------------|----|----|----|----|----|----|----|----|-----|-----|-----|-----|-----|-----|-----|-----|-----|-----|-----|-----|-----|-----|-----|-----|-----|-----|---------------------|
|      |       | e1                       | e2 | e3 | e4 | e5 | e6 | e7 | e8 | e9 | e10 | e11 | e12 | e13 | e14 | e15 | e16 | e17 | e18 | e19 | e20 | e21 | e22 | e23 | e24 | e25 | e26 | e27 |                     |
| ABAL | ROSE  |                          |    | X  | X  |    |    |    |    |    |     |     |     |     |     |     |     |     |     |     |     |     |     |     |     |     | X   | X   | $r_s > 0.4$         |
|      | PESC  |                          |    |    |    |    |    |    |    |    |     |     |     |     |     |     |     |     |     |     |     |     |     | X   |     |     | X   |     | $0.3 < r_s < 0.4$   |
|      | IANN  |                          |    |    |    |    |    |    |    |    |     |     |     |     |     |     |     |     |     |     |     |     |     |     |     |     |     |     | $0.2 < r_s < 0.3$   |
|      | CUGN  |                          |    |    |    |    | X  |    |    |    |     |     |     |     |     | X   |     |     | X   |     |     |     | X   |     |     |     |     |     | $0.1 < r_s < 0.2$   |
|      | PANT  |                          |    |    |    |    |    |    |    |    |     |     |     |     |     |     |     |     | X   |     |     |     |     |     |     |     |     |     | $0 < r_s < 0.1$     |
|      | GARA  |                          |    | X  |    | X  |    |    |    |    |     |     |     |     |     |     | X   | X   |     |     |     | X   |     |     |     | X   | X   | X   | 0                   |
|      | GUAR  |                          |    |    |    |    | X  |    |    |    |     |     |     | X   |     | X   |     |     |     |     |     |     |     |     |     |     |     | X   | $0 < r_s < -0.1$    |
|      | PORH  |                          |    |    |    |    | X  | X  | X  | X  |     |     |     |     |     | X   |     |     |     |     |     |     |     |     |     |     |     |     | $-0.1 < r_s < -0.2$ |
|      | PORL  |                          |    |    |    | X  | X  | X  | X  | X  | X   |     |     |     |     | X   |     |     |     |     |     |     |     |     |     |     |     |     | $-0.2 < r_s < -0.3$ |
|      | SJPE  | X                        |    |    |    |    |    |    | X  | X  |     |     |     |     | X   |     |     |     |     |     |     |     |     |     |     |     |     |     | $-0.3 < r_s < -0.4$ |
|      | BOUM  |                          |    |    |    |    |    |    | X  |    |     |     |     |     |     | X   |     |     |     |     |     |     |     |     |     |     |     |     | $r_s < -0.4$        |
|      | MONT  |                          |    |    |    |    |    |    |    |    |     |     |     |     | X   |     |     |     |     |     |     |     |     |     |     | X   |     |     |                     |
| ABBR | ABRH  |                          |    |    |    |    |    |    |    |    |     |     |     |     |     |     |     |     |     |     |     |     |     |     |     |     |     |     |                     |
|      | ABRM  |                          |    |    | X  |    |    |    |    |    |     |     |     |     |     |     |     |     |     |     |     |     |     |     |     |     |     |     |                     |
|      | ABRL  |                          |    |    | X  |    |    |    |    |    |     |     |     |     |     |     |     |     |     |     |     |     |     |     |     |     |     |     |                     |
|      | KARP1 |                          |    |    |    |    |    |    |    |    |     |     |     |     |     |     |     |     |     | X   |     |     |     |     | X   |     | X   |     |                     |
|      | PERT  |                          |    |    |    |    |    |    |    |    |     |     |     |     |     |     |     | X   |     | X   |     |     |     |     |     |     |     |     |                     |
| ABCE | AINO  |                          |    |    |    | X  |    |    |    |    |     |     |     |     |     |     |     |     |     |     |     |     |     | X   |     | X   | X   |     |                     |
|      | KARP2 |                          |    |    |    |    |    |    |    |    |     |     |     |     |     |     |     |     |     | X   |     |     |     |     |     |     |     |     |                     |
|      | PARN  |                          |    |    |    |    |    |    |    |    |     |     |     |     |     |     |     |     |     |     |     |     |     |     |     | X   |     |     |                     |
| ABCI | leb2  |                          | X  |    | X  |    |    |    |    |    | X   |     | X   |     | X   |     |     |     |     |     | X   |     |     |     |     |     | X   |     |                     |
|      | syr2  |                          |    | X  | X  |    |    |    |    |    |     |     |     |     |     |     |     |     |     |     |     |     |     |     |     |     |     |     |                     |
|      | tu24  |                          |    |    |    |    |    |    |    |    |     |     |     |     |     | X   |     | X   | X   | X   |     |     |     |     |     |     | X   |     |                     |
|      | DEAC  |                          |    |    |    |    |    |    |    |    |     |     |     |     |     |     |     |     | X   |     |     |     |     | X   |     |     |     |     |                     |
|      | IBAC  |                          |    | X  |    |    |    |    |    |    |     |     |     |     |     |     |     |     |     |     |     |     |     | X   |     |     |     |     |                     |
| ABPI | APSB  |                          |    |    |    |    | X  | X  |    |    |     |     |     |     |     | X   |     |     |     |     | X   |     | X   | X   | X   |     | X   |     |                     |
|      | APSG  |                          |    |    | X  | X  |    |    |    |    |     |     |     |     |     | X   |     |     |     |     |     |     | X   | X   |     |     | X   |     |                     |
|      | APSN  |                          |    |    | X  |    |    |    |    |    |     |     |     |     |     |     |     |     | X   | X   |     | X   |     | X   |     |     | X   |     |                     |
| ABMC | ABMC  |                          |    | X  |    |    |    |    |    |    |     |     |     |     |     | X   |     | X   | X   |     | X   |     | X   | X   | X   | X   |     |     |                     |
| ABTZ | ABTZ  |                          |    |    |    |    | X  |    |    |    |     |     |     |     |     | X   |     |     |     |     |     |     |     | X   |     |     | X   |     |                     |

| (B)   |       | Extreme Climate Indices* |    |    |    |    |    |    |    |    |    |     |     |     |     |     |     |     |     |     |     |     |     |     |     |     |     |     | Legend |
|-------|-------|--------------------------|----|----|----|----|----|----|----|----|----|-----|-----|-----|-----|-----|-----|-----|-----|-----|-----|-----|-----|-----|-----|-----|-----|-----|--------|
|       |       | Site                     | e1 | e2 | e3 | e4 | e5 | e6 | e7 | e8 | e9 | e10 | e11 | e12 | e13 | e14 | e15 | e16 | e17 | e18 | e19 | e20 | e21 | e22 | e23 | e24 | e25 | e26 |        |
| ABAL  | ROSE  |                          |    |    |    |    |    |    |    |    |    |     |     |     |     |     |     |     |     |     |     | X   |     |     |     | X   | X   |     |        |
|       | PESC  |                          |    |    |    |    |    |    |    |    |    |     |     |     |     |     |     |     |     |     |     |     | X   |     |     |     |     |     |        |
|       | IANN  |                          |    |    |    |    |    |    |    |    |    | X   |     |     |     | X   |     |     |     |     |     |     |     |     | X   | X   |     |     |        |
|       | CUGN  |                          |    |    |    |    |    |    |    |    |    | X   |     |     |     |     |     |     |     |     |     |     |     |     | X   | X   |     |     |        |
|       | PANT  |                          |    |    |    |    |    |    |    |    |    |     |     |     |     |     |     |     |     |     |     |     |     |     | X   | X   |     |     | X      |
|       | GARA  |                          |    |    |    |    |    |    |    |    |    |     |     |     |     |     |     |     |     |     |     |     |     |     | X   |     |     |     |        |
|       | GUAR  |                          |    | X  |    |    |    |    |    |    |    |     |     |     |     |     |     |     |     |     |     |     |     |     | X   | X   |     |     | X      |
|       | PORH  |                          |    | X  | X  |    |    |    |    |    |    |     |     |     |     |     |     | X   |     |     |     |     |     |     |     |     |     |     |        |
|       | PORL  | X                        |    | X  | X  |    |    |    |    |    |    |     |     |     |     |     |     | X   |     |     |     |     |     |     | X   |     |     |     | X      |
|       | SJPE  | X                        | X  | X  |    | X  |    |    |    |    |    |     |     |     |     |     |     | X   | X   |     |     |     |     |     | X   |     |     |     | X      |
|       | BOUM  |                          | X  |    | X  | X  |    |    | X  | X  |    |     |     |     |     |     |     |     |     |     |     |     |     |     | X   |     |     |     |        |
|       | MONT  |                          |    | X  | X  | X  |    |    |    |    |    |     |     |     |     |     |     |     | X   | X   |     |     |     |     |     |     |     |     |        |
|       | ABBR  | ABRH                     |    |    |    |    |    |    |    |    |    |     |     |     |     |     |     |     |     | X   | X   |     |     |     |     |     |     |     |        |
| ABRM  |       |                          |    |    |    |    |    |    |    |    |    |     |     |     |     |     |     |     | X   | X   |     |     |     |     |     |     |     |     |        |
| ABRL  |       |                          |    |    |    |    |    |    |    |    |    |     |     |     |     |     |     |     | X   | X   |     |     |     |     |     |     |     |     |        |
| KARP1 |       |                          |    |    |    |    |    |    |    |    |    |     |     |     |     |     |     |     | X   |     |     |     |     |     |     |     |     |     |        |
| PERT  |       |                          |    |    |    | X  |    |    |    |    |    |     |     |     |     |     |     |     |     |     |     |     |     |     |     | X   |     |     |        |
| ABCE  | AINO  |                          |    |    |    |    |    |    |    |    |    |     |     |     |     |     |     |     |     |     |     |     |     | X   |     |     |     |     |        |
|       | KARP2 |                          |    |    |    |    |    |    |    |    |    |     |     |     |     |     |     |     |     |     |     |     |     | X   |     |     |     |     |        |
|       | PARN  |                          |    |    |    | X  |    |    |    |    |    |     |     |     |     |     |     |     |     |     |     | X   |     |     | X   |     |     | X   |        |
| ABCI  | leb2  | X                        |    |    |    |    |    |    |    |    |    |     |     |     |     |     |     |     |     |     |     |     |     | X   | X   |     |     | X   |        |
|       | syr2  | X                        |    |    |    |    | X  |    | X  | X  | X  |     |     |     |     | X   |     |     |     |     |     |     |     |     |     |     |     |     |        |
|       | tu24  |                          |    |    |    |    |    |    | X  |    |    |     |     |     |     |     |     |     |     |     |     |     |     |     | X   |     |     |     |        |
|       | DEAC  |                          |    |    |    | X  |    |    |    |    |    |     |     |     |     |     |     |     |     |     |     |     |     |     | X   |     |     | X   |        |
|       | IBAC  |                          |    |    |    |    |    |    |    |    |    |     |     |     |     |     |     |     |     |     |     |     |     |     |     | X   |     | X   |        |
| ABPI  | APSB  | X                        |    |    |    |    |    | X  | X  |    |    |     |     |     |     |     |     |     |     |     |     |     |     | X   | X   |     |     | X   |        |
|       | APSG  | X                        | X  | X  |    | X  |    | X  | X  |    |    |     |     |     |     |     |     |     |     |     |     |     | X   |     | X   | X   |     | X   |        |
|       | APSN  | X                        | X  | X  |    |    |    | X  | X  |    |    |     |     |     |     |     | X   |     |     |     |     |     |     | X   | X   |     |     | X   |        |
| ABMC  | ABMC  | X                        |    |    |    |    |    | X  |    |    |    |     |     |     |     |     | X   |     |     |     |     |     | X   |     | X   |     |     |     |        |
| ABTZ  | ABTZ  |                          |    |    | X  | X  |    | X  | X  |    |    |     |     |     |     | X   |     |     |     |     |     |     | X   |     | X   | X   |     |     |        |

\*e1:  $FD$ ; e2:  $SU$ ; e3:  $ID$ ; e4:  $TR$ ; e5:  $GLS$ ; e6:  $TX_x$ ; e7:  $TN_x$ ; e8:  $TX_n$ ; e9:  $TN_n$ ; e10:  $TN_{10p}$ ; e11:  $TX_{10p}$ ; e12:  $TN_{90p}$ ; e13:  $TX_{90p}$ ; e14:  $WSDI$ ; e15:  $CSDI$ ; e16:  $DTR$ ; e17:  $R_{x1day}$ ; e18:  $R_{x5day}$ ; e19:  $SDII$ ; e20:  $R_{10mm}$ ; e21:  $R_{20mm}$ ; e22:  $R_{1mm}$ ; e23:  $CDD$ ; e24:  $CWD$ ; e25:  $R_{95pTOT}$ ; e26:  $R_{99pTOT}$ ; e27:  $PRC_{TOT}$

## Supplementary Figures

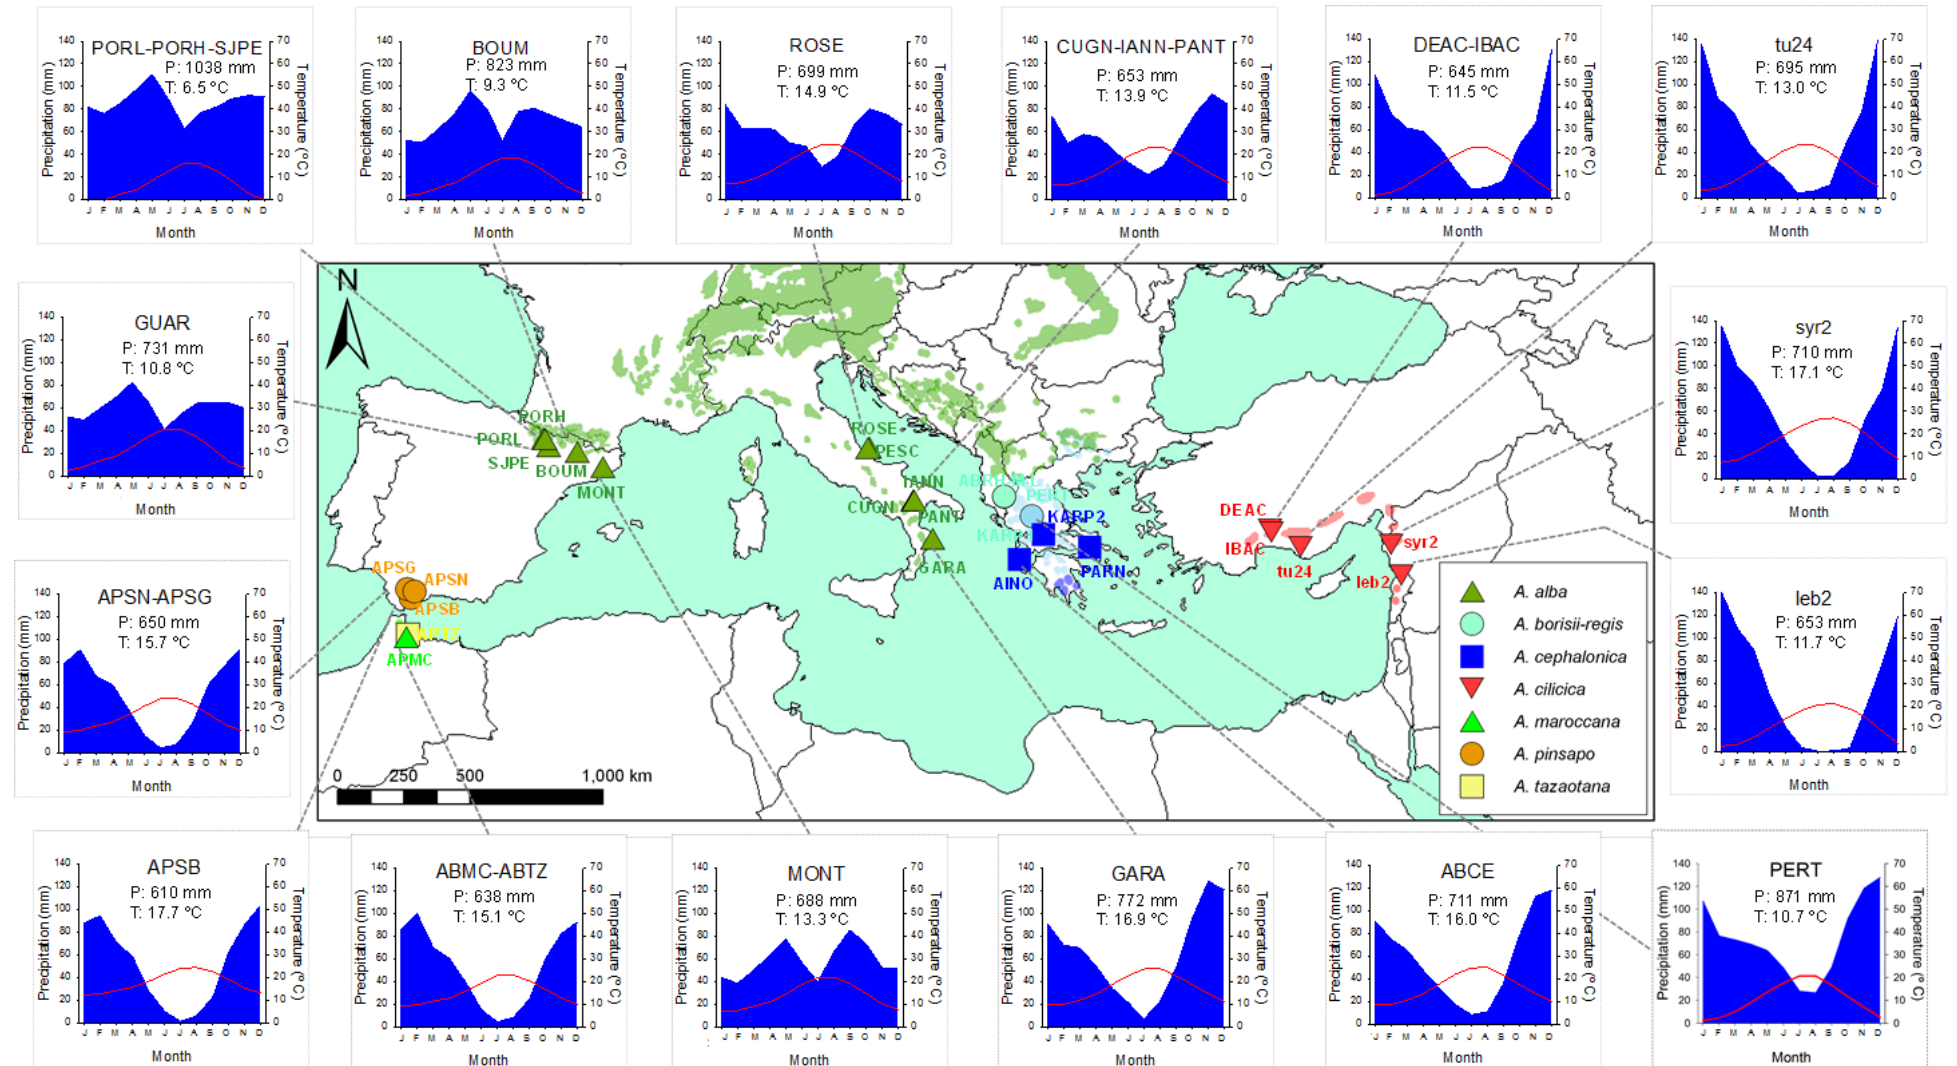

**Fig. S1.** Distribution of the sampled Mediterranean fir forests and climatic diagram for each study site. Total monthly precipitation (P) and mean monthly temperature (T) corresponding to the 1950-2010 period (see site codes in *SI Appendix*, Table S1).

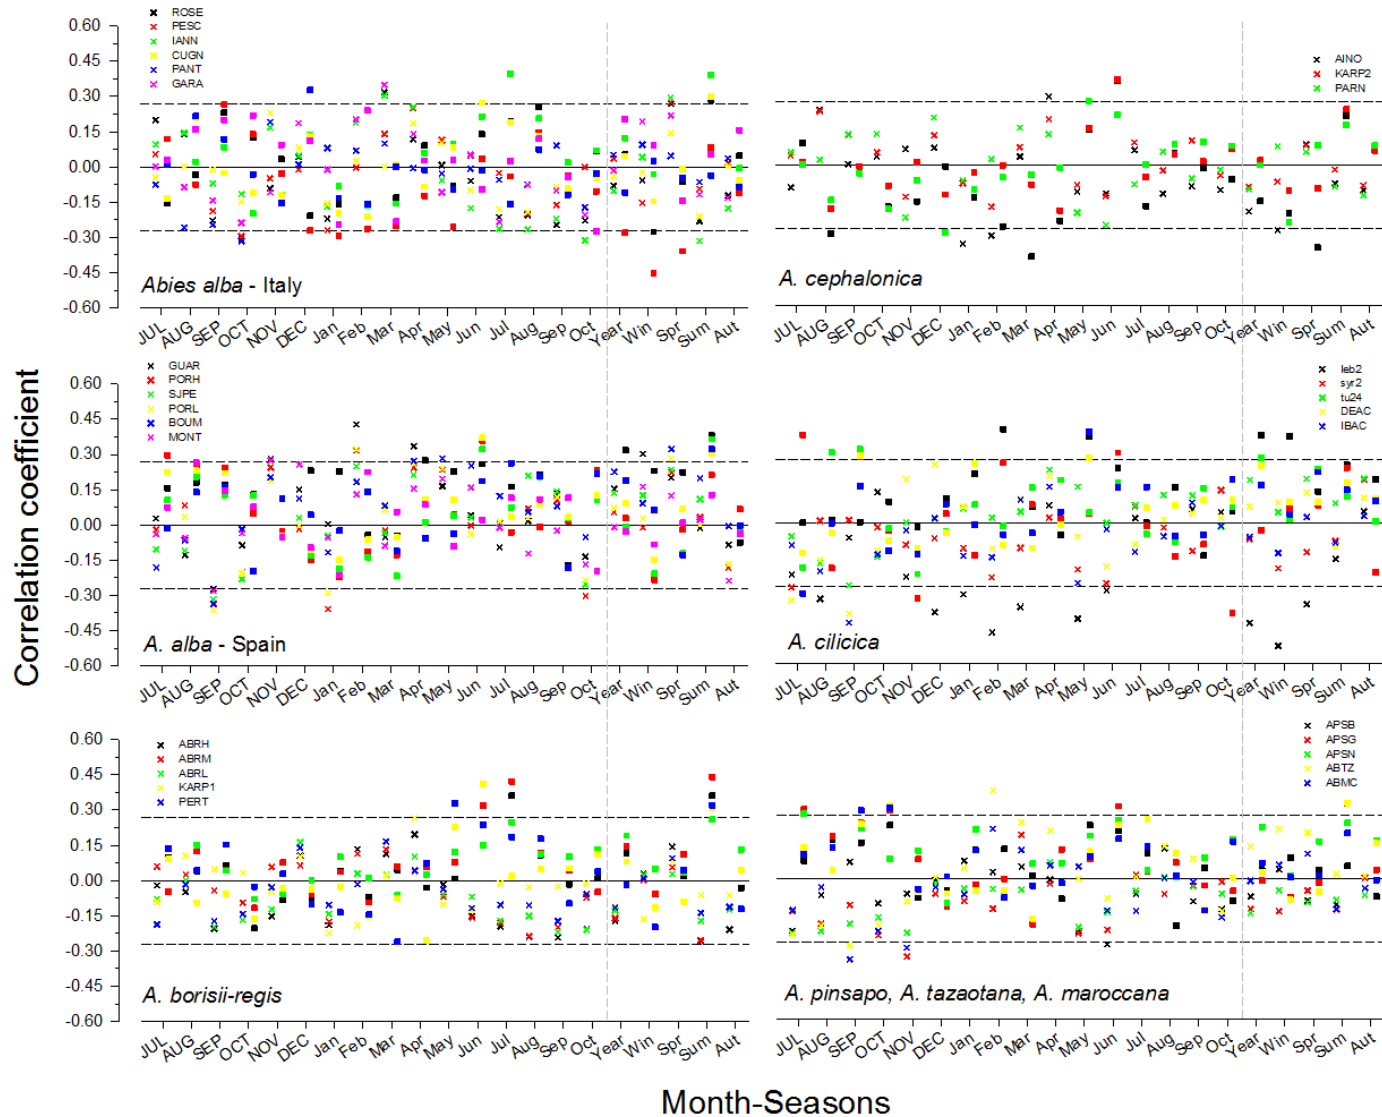

**Fig. S2.** Pearson correlation coefficients calculated between TRWi and climate variables. Pearson correlation coefficients calculated between site chronologies of tree-ring width indices (TRWi) and mean temperature (cross symbols) and total precipitation (square symbols) for the studied *Abies* species in the common period 1950-2010. The analyzed temporal window spans from previous (capital letter) July to current October and seasonal periods. The values located outside the dashed lines indicate significant ( $P < 0.05$ ) correlation coefficients.



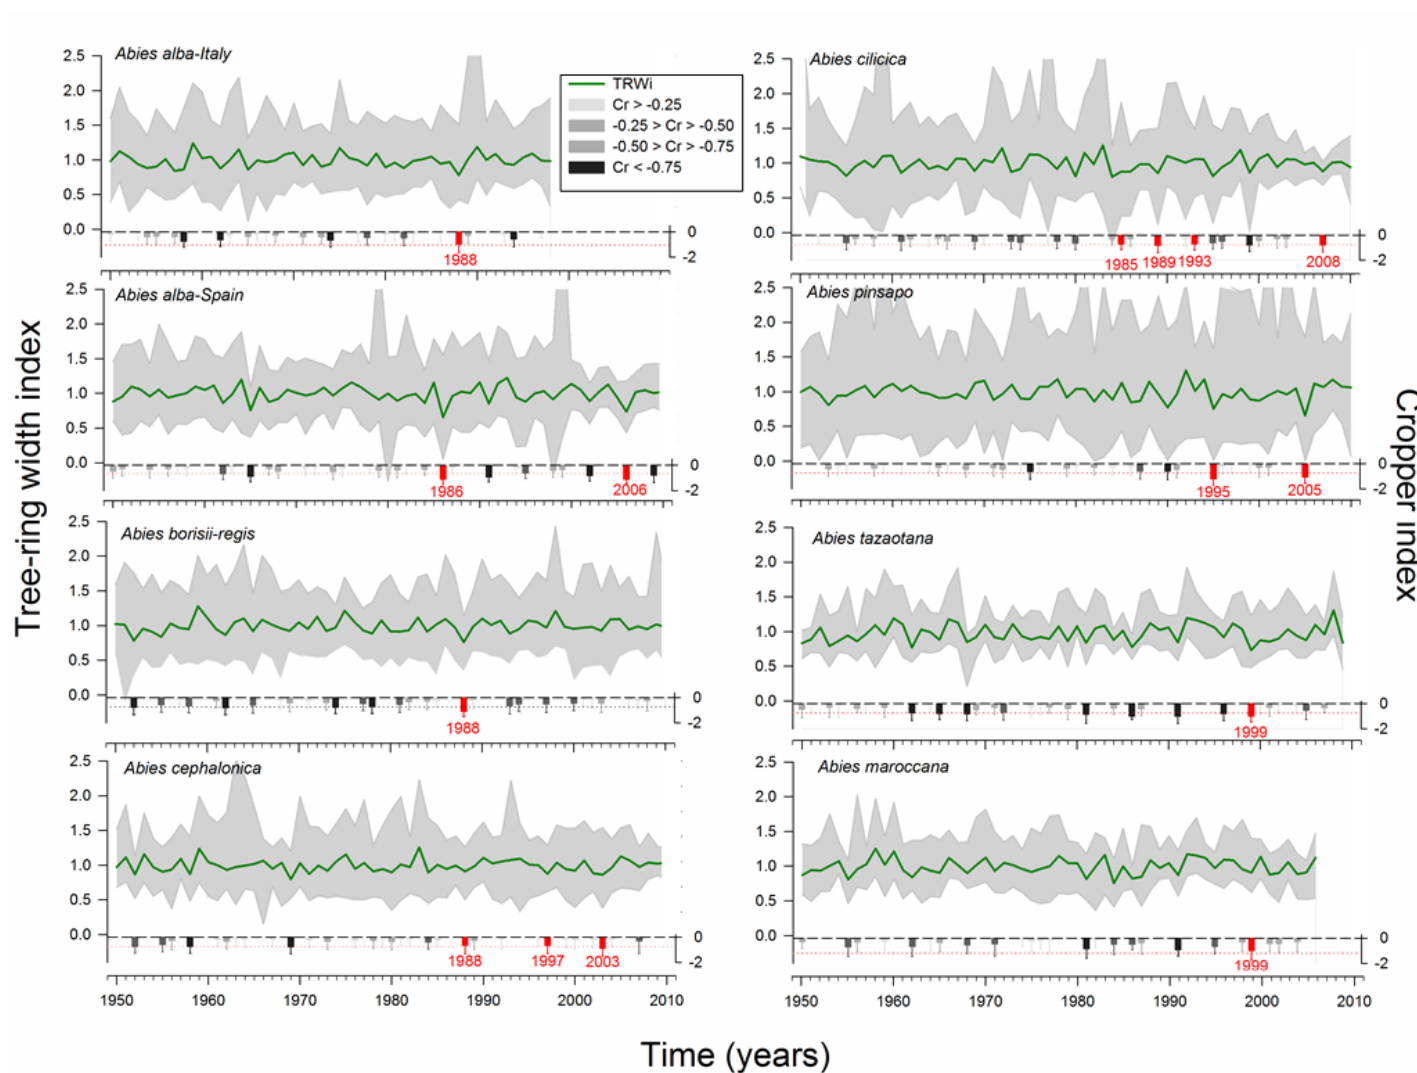

**Fig. S3.** Tree-ring width indices (TRWi) calculated for each fir species and extreme growth years (Cropper index, right y axis). Means are shown as dark green lines and grey areas represent the maximum and minimum TRWi values considering all studied sites per species. The lower plots show negative pointer years (bars) expressed as Cropper indices. The red bars and numbers indicate selected climatically extreme years causing a sharp growth reduction. Horizontal lines frame extreme Cropper values.

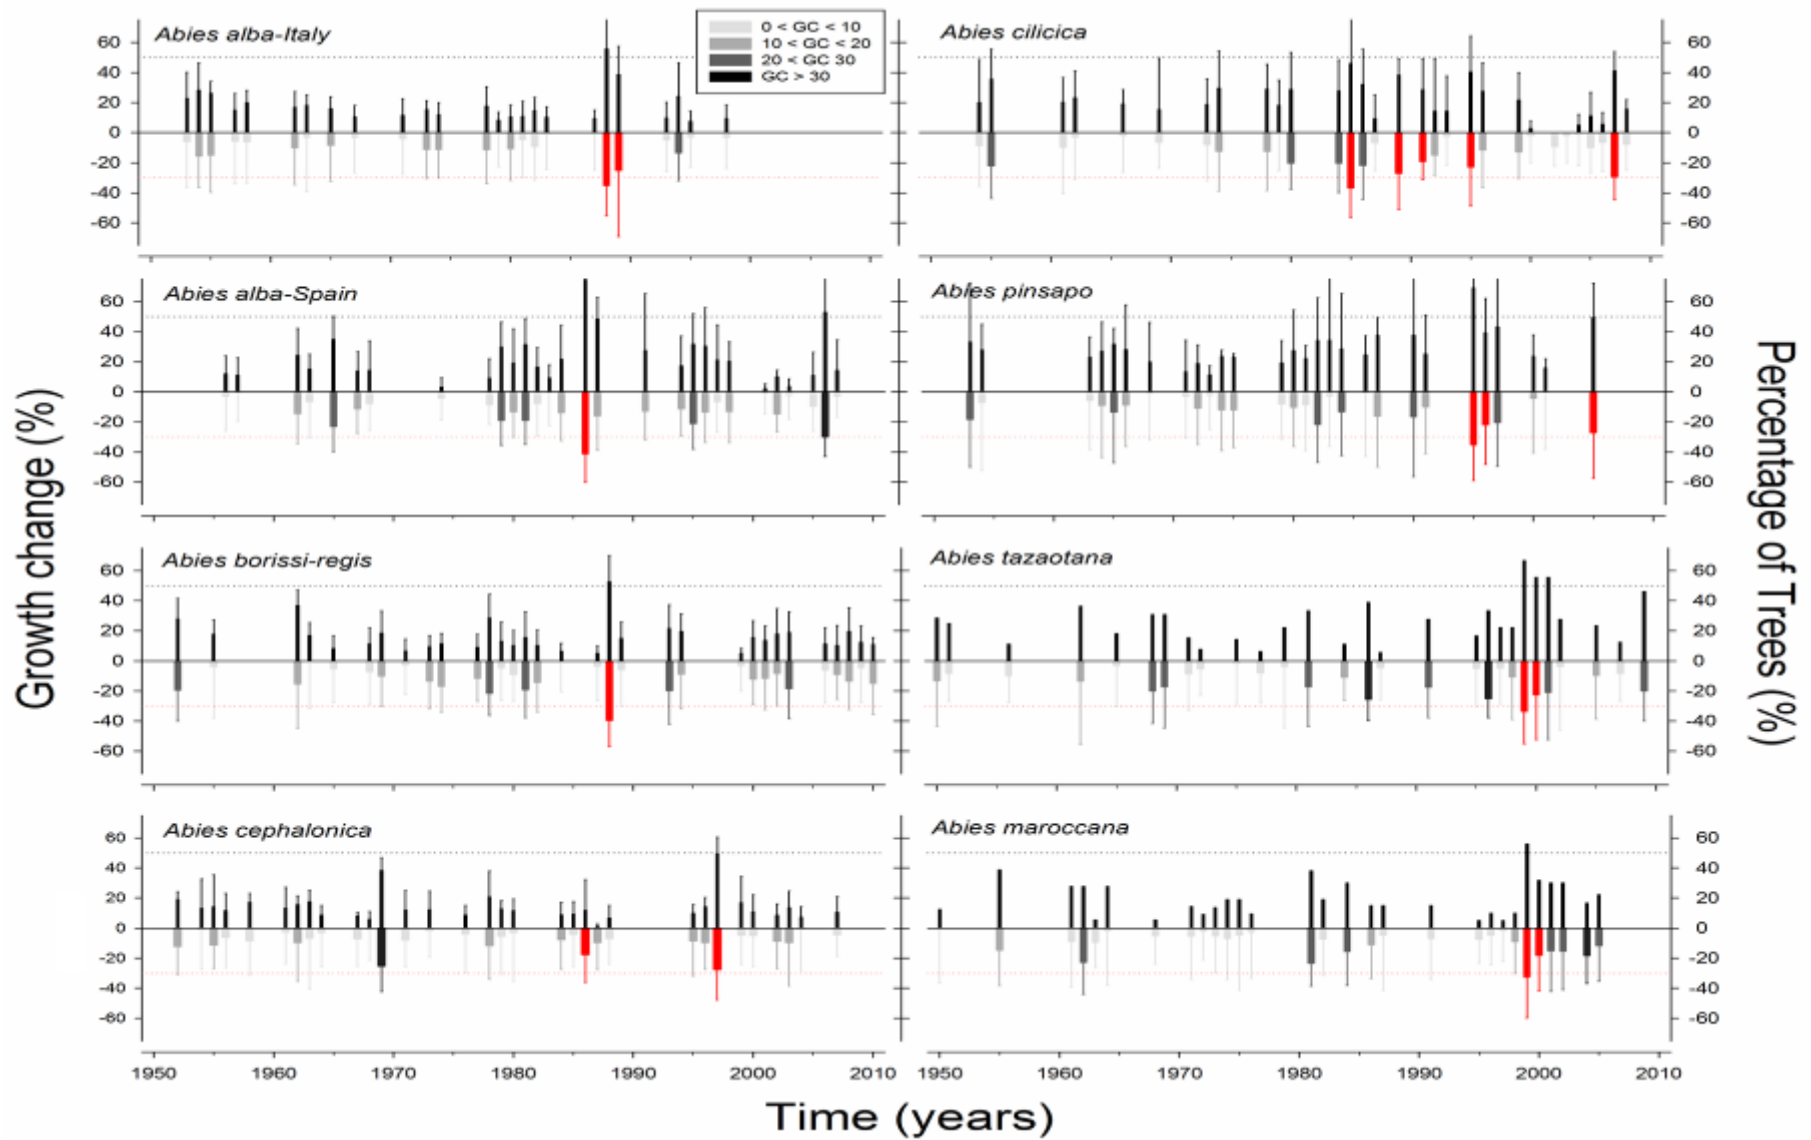

**Fig. S4.** Percentage of Growth Change (%) to the observed extreme negative years. Percentage of Growth Change (%) to the extreme negative years and percentages of trees showing drought- or heat-induced pointer years during the period 1950-2010 for each of the studied *Abies* species.

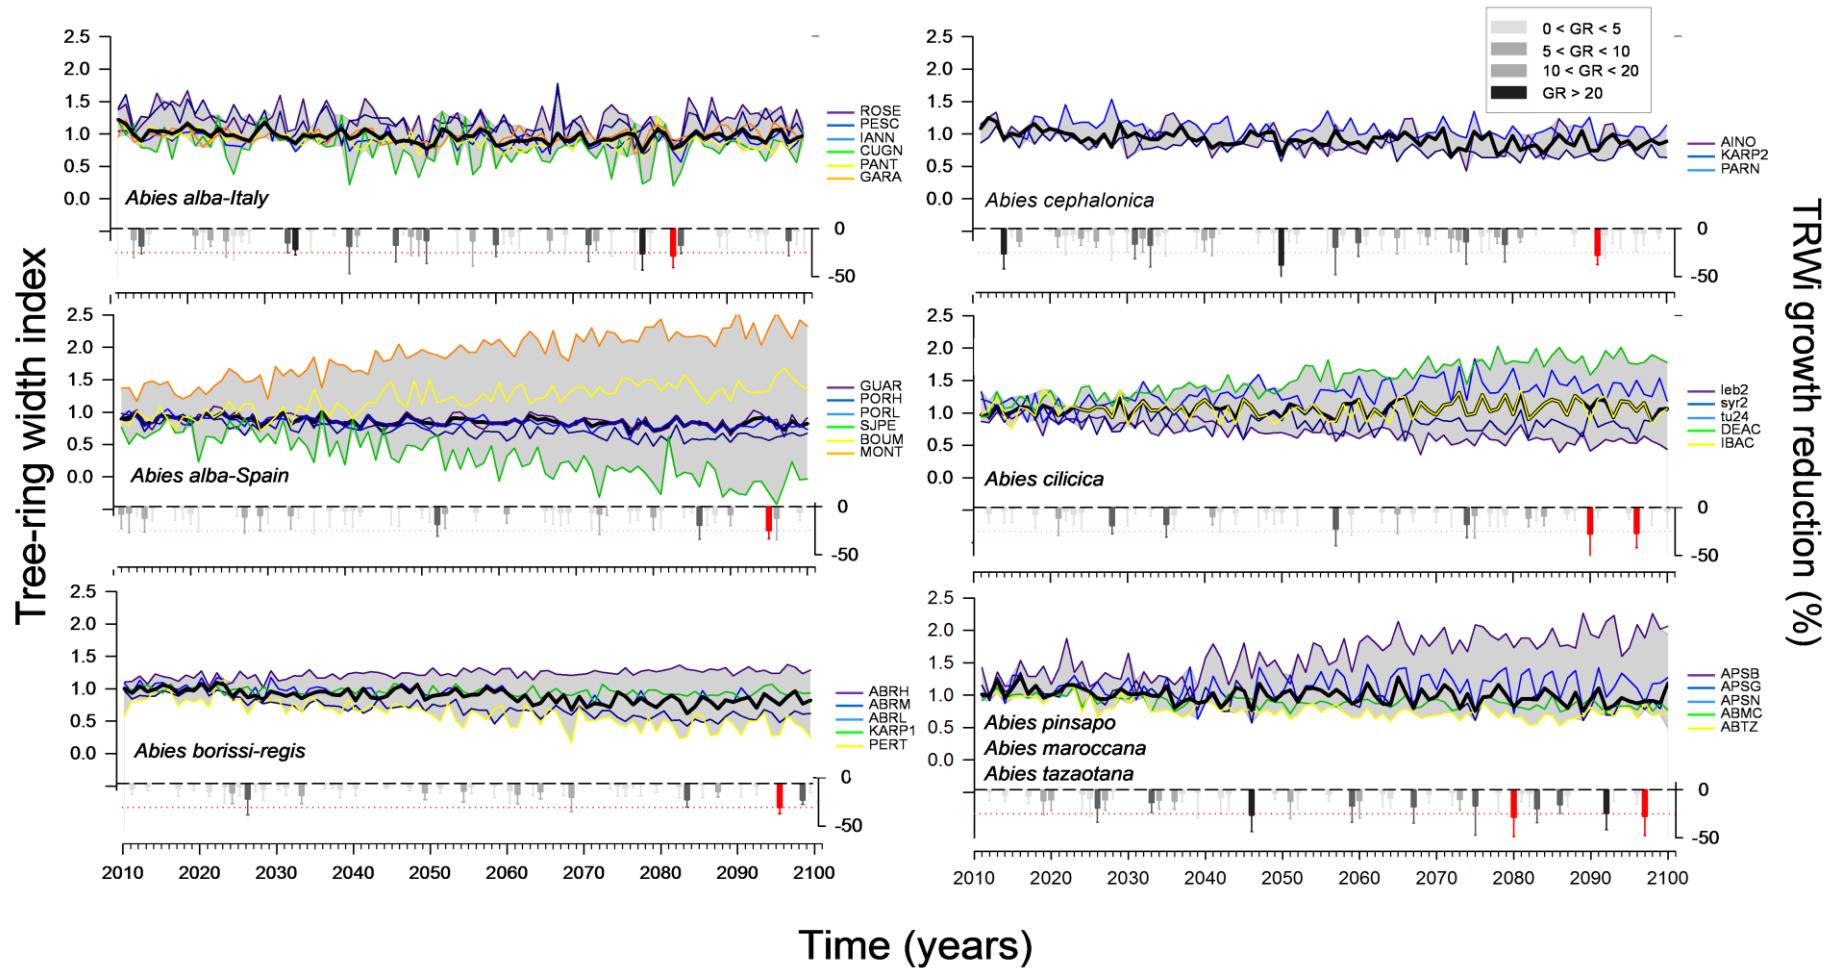

**Fig. S5.** Growth projections according to RCP 4.5 emission scenarios (2). Projected tree-ring width indices ( $TRW_{i_p}$ ) for each *Abies* species site considering the emission scenario RCP 4.5. Species means are shown as black lines and grey polygons represent the  $TRW_{i_p}$  maximum and minimum values considering all sites per species. The graph below shows the projected change in TRWi reduction (GR) computed considering the 5-year moving average values from 2011 to 2100 period. The red bars and numbers indicate selected climatically extreme years causing reduced growth in each species during the 21st century. Bold lines frame extreme values ( $GR > 25\%$ ).

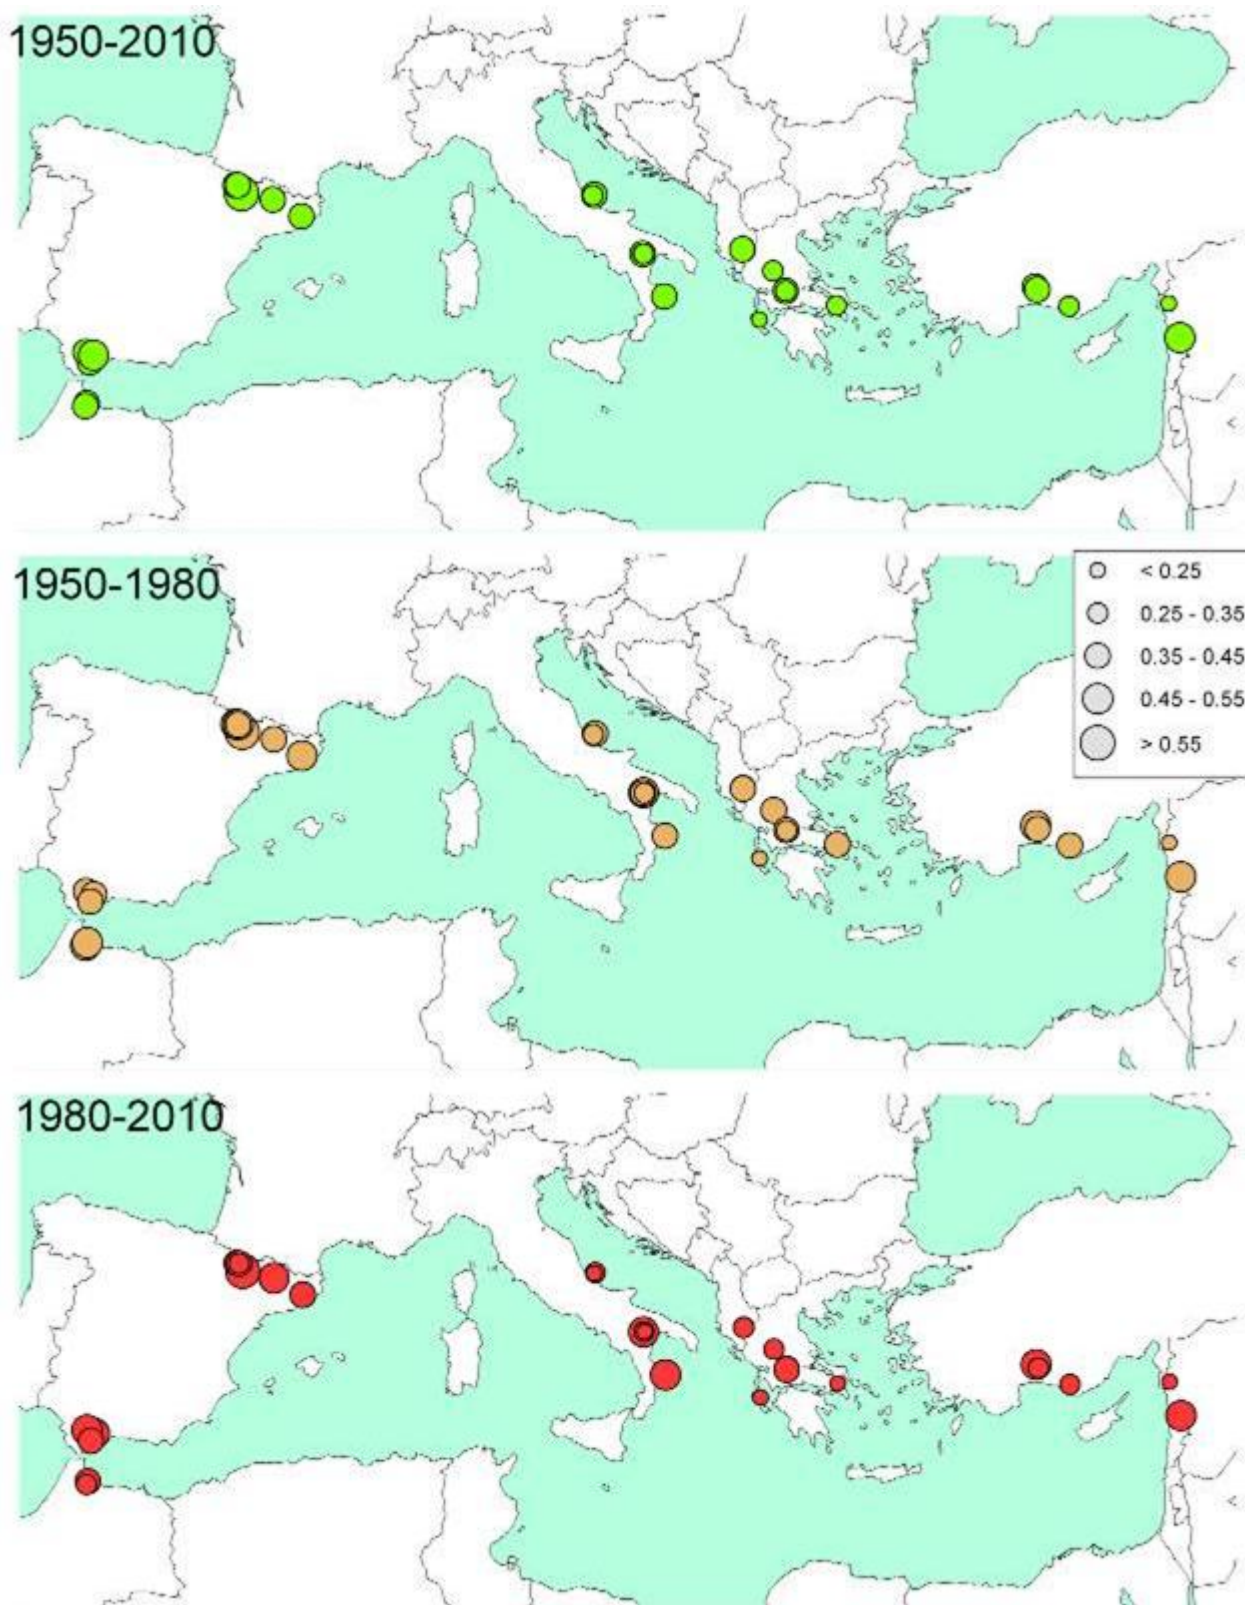

**Fig. S6.** Maps displaying Pearson correlation coefficients calculated at site level between observed (TRWi) and VS-Lite model projected (TRWi<sub>VSL</sub>) tree-ring indices for *Abies* species. Plots show the entire period of analyses (1950–2010, green symbols) and two sub-periods (1950–1980, orange symbols; and 1980–2010, red symbols). Correlation values higher than 0.25 are significant at  $P < 0.05$ .



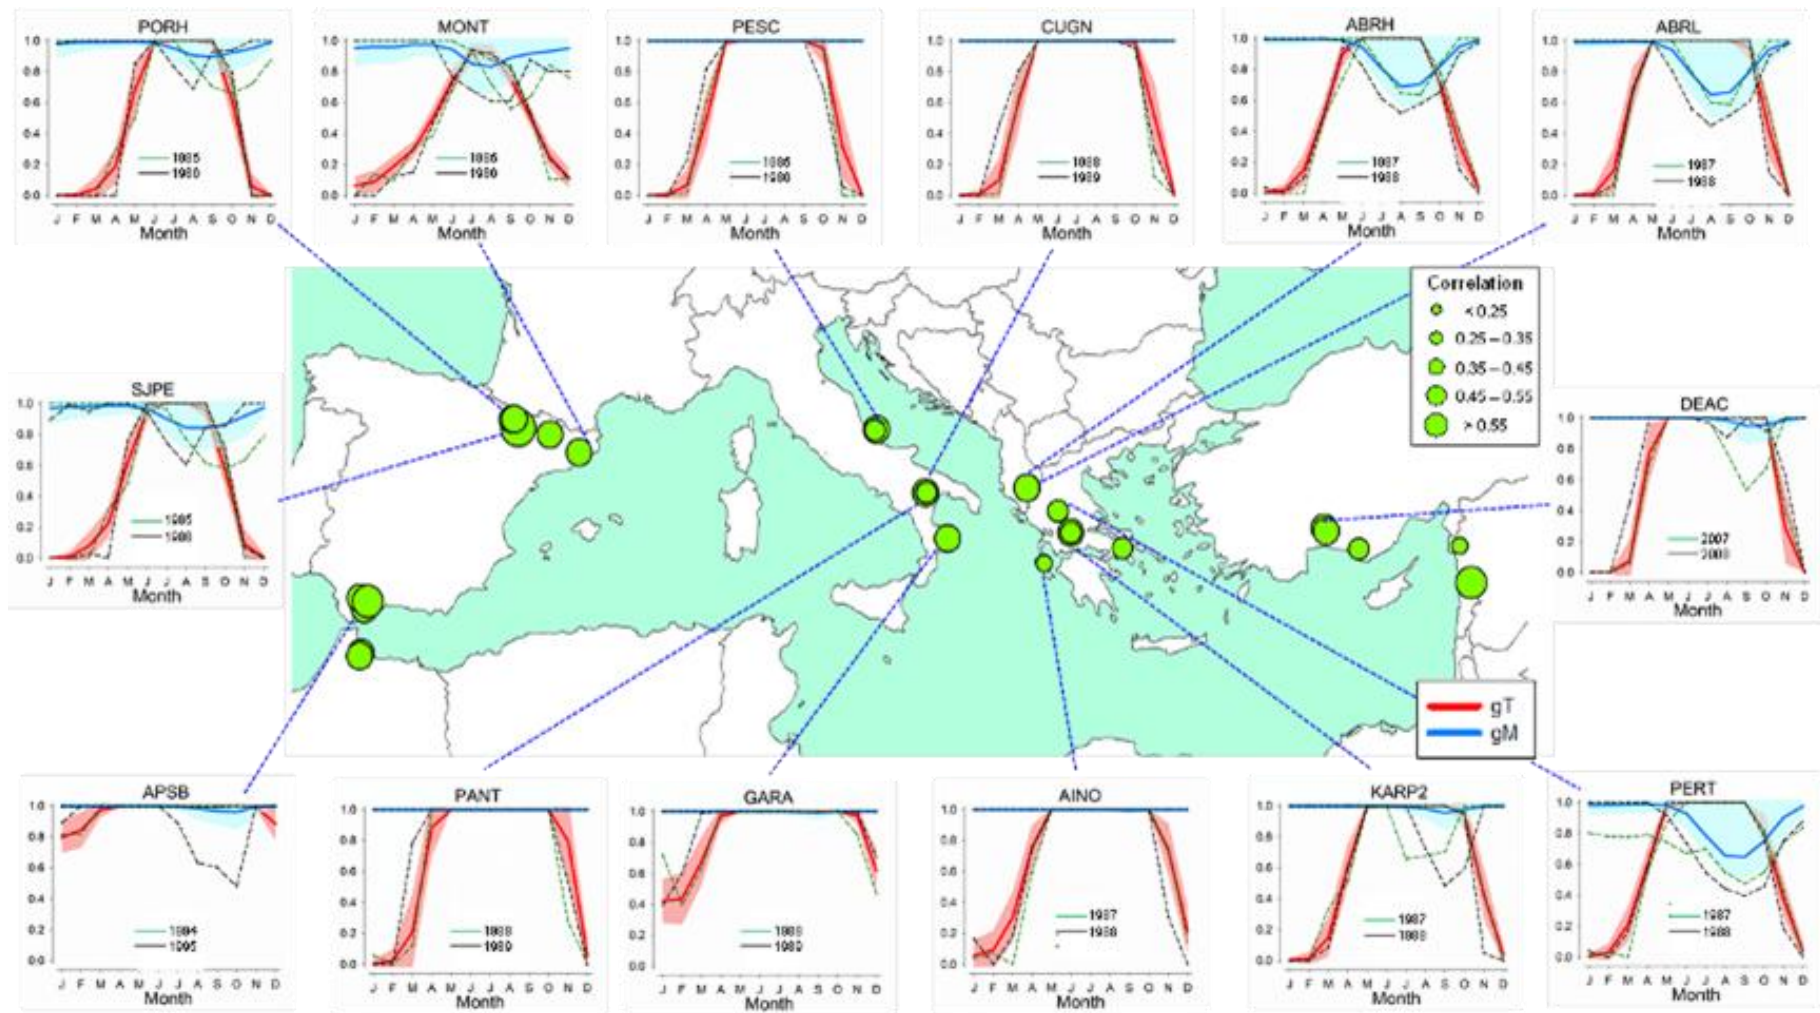

**Fig. S7.** Simulated monthly growth response curves ( $g_T$ ,  $g_M$ ) for the period 1950-2010. Simulated (VS-Lite, period 1950-2010) monthly growth response curves considering temperature ( $g_T$ , red lines-mean and areas-SD) and soil moisture limitations ( $g_M$ , blue lines-mean and areas-SD) for each species. Selected extreme events are indicated in different colors (see Figs. 2 and 3). See *SI Appendix*, Table S1 for site codes.

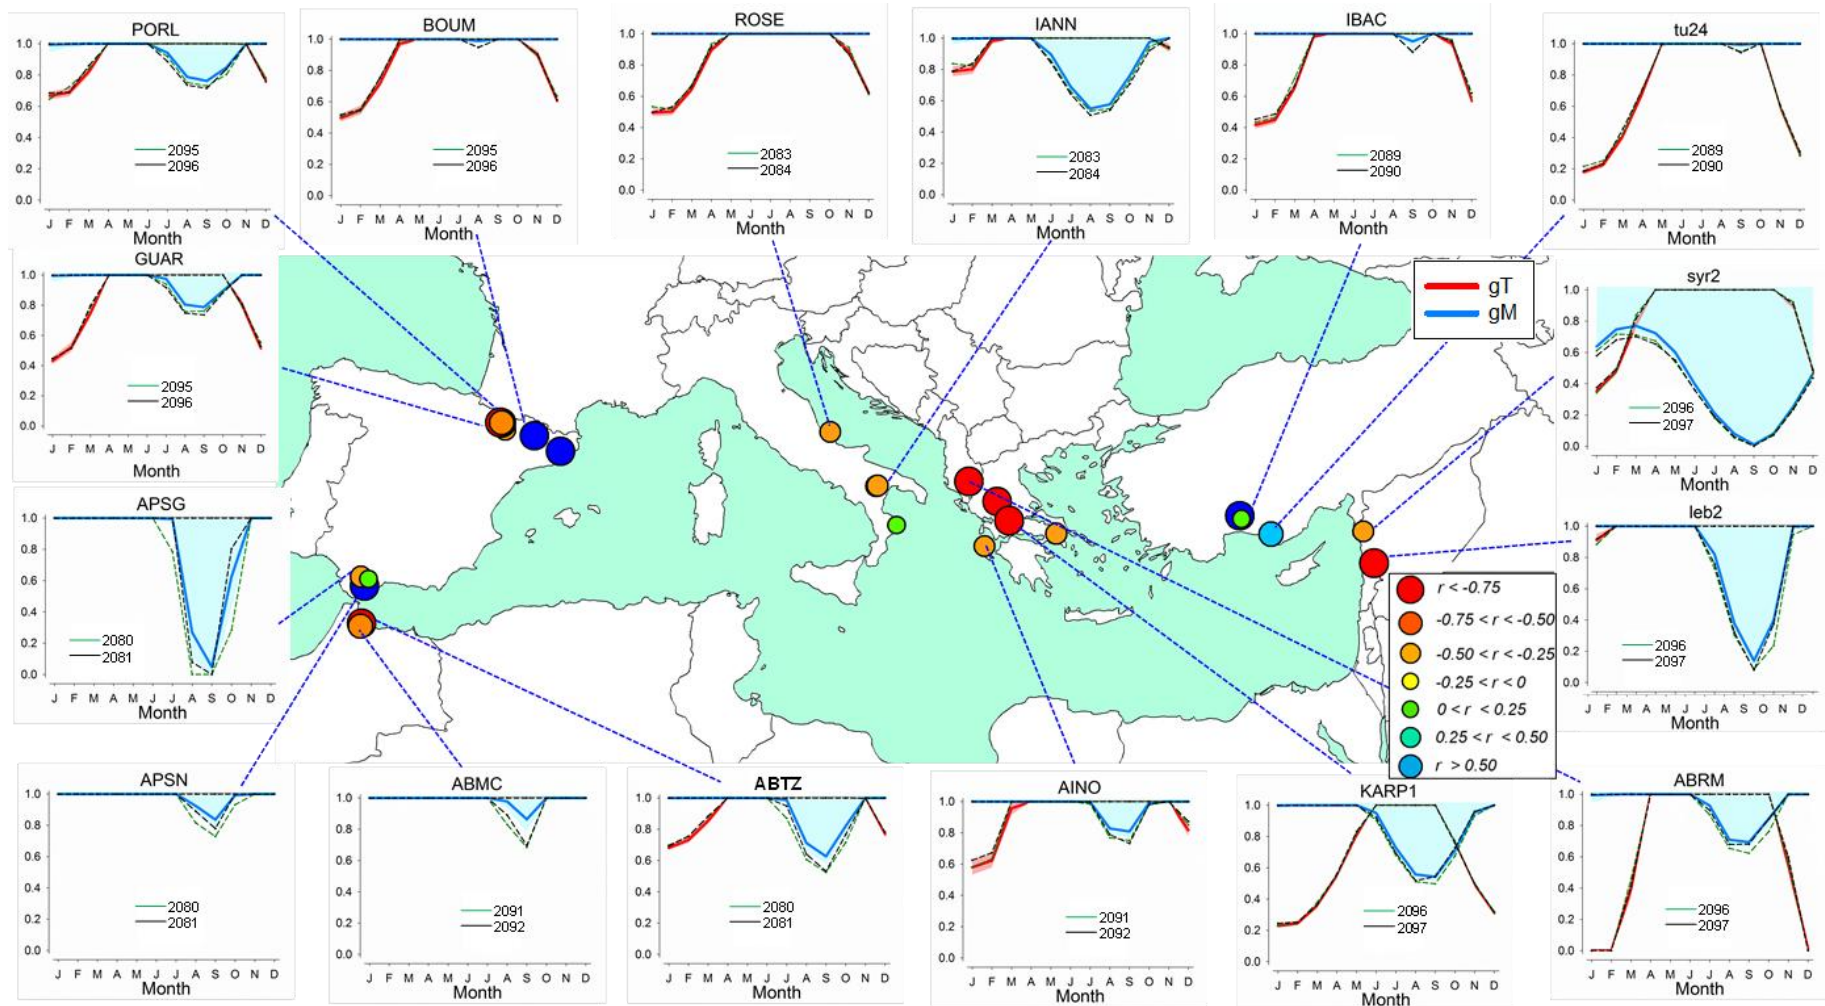

**Fig. S8.** Projected monthly growth response curves ( $gT$ ,  $gM$ ) for the period 2050-2100 for RCP 4.5 and RCP 8.5 emission scenarios. Projected monthly growth response curves corresponding to the RCP4.5 (upper map) and RCP 8.5 emission scenarios (below map) with VS-Lite for the period 2050-2100 considering temperature ( $gT$ , red lines-mean and areas-SD) and soil moisture limitations ( $gM$ , blue lines-mean and areas-SD) for each selected site. Selected extreme events are indicated in different colors (see Figs. 4 and 5). Map displaying projected growth trends (Pearson correlation coefficients of site mean tree-ring width indices series) considering the 2011–2100 period following growth projections based on respective emission scenarios. Values higher than 0.25 and lower than 0.25 are significant at  $P < 0.05$ . See *SI Appendix* Table S1 for site codes.



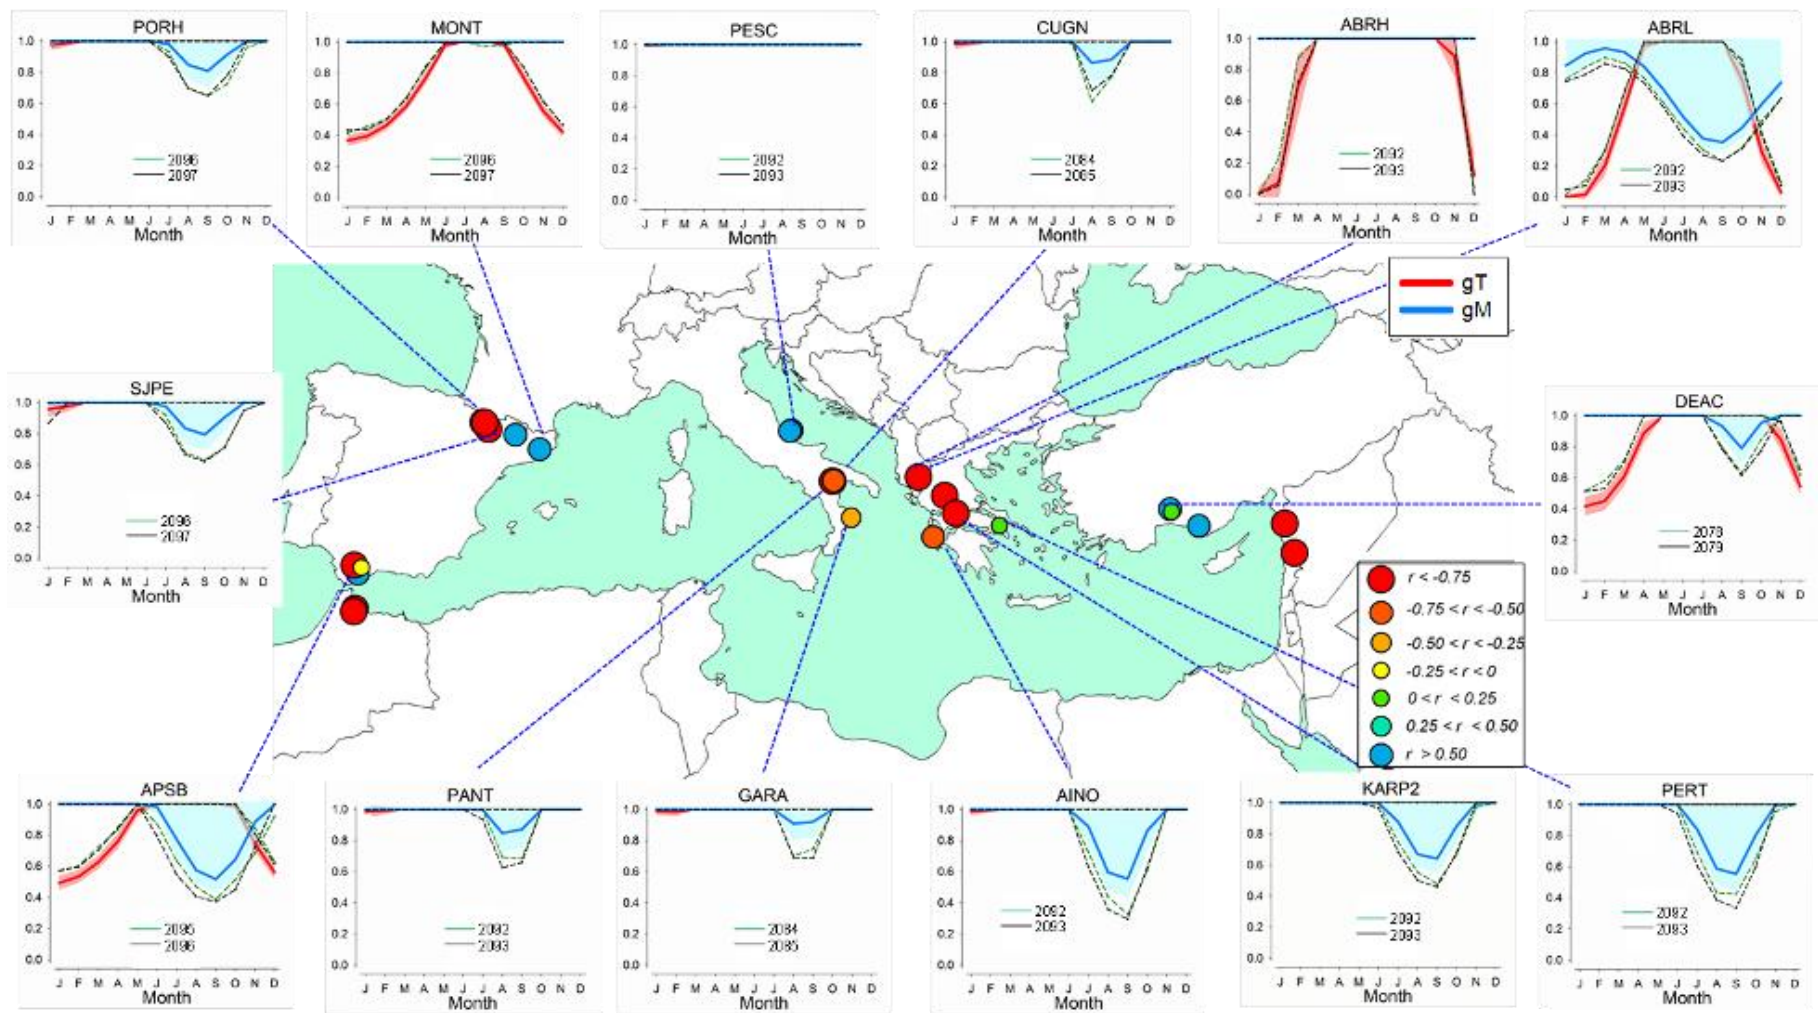

Fig. S8. Continued.

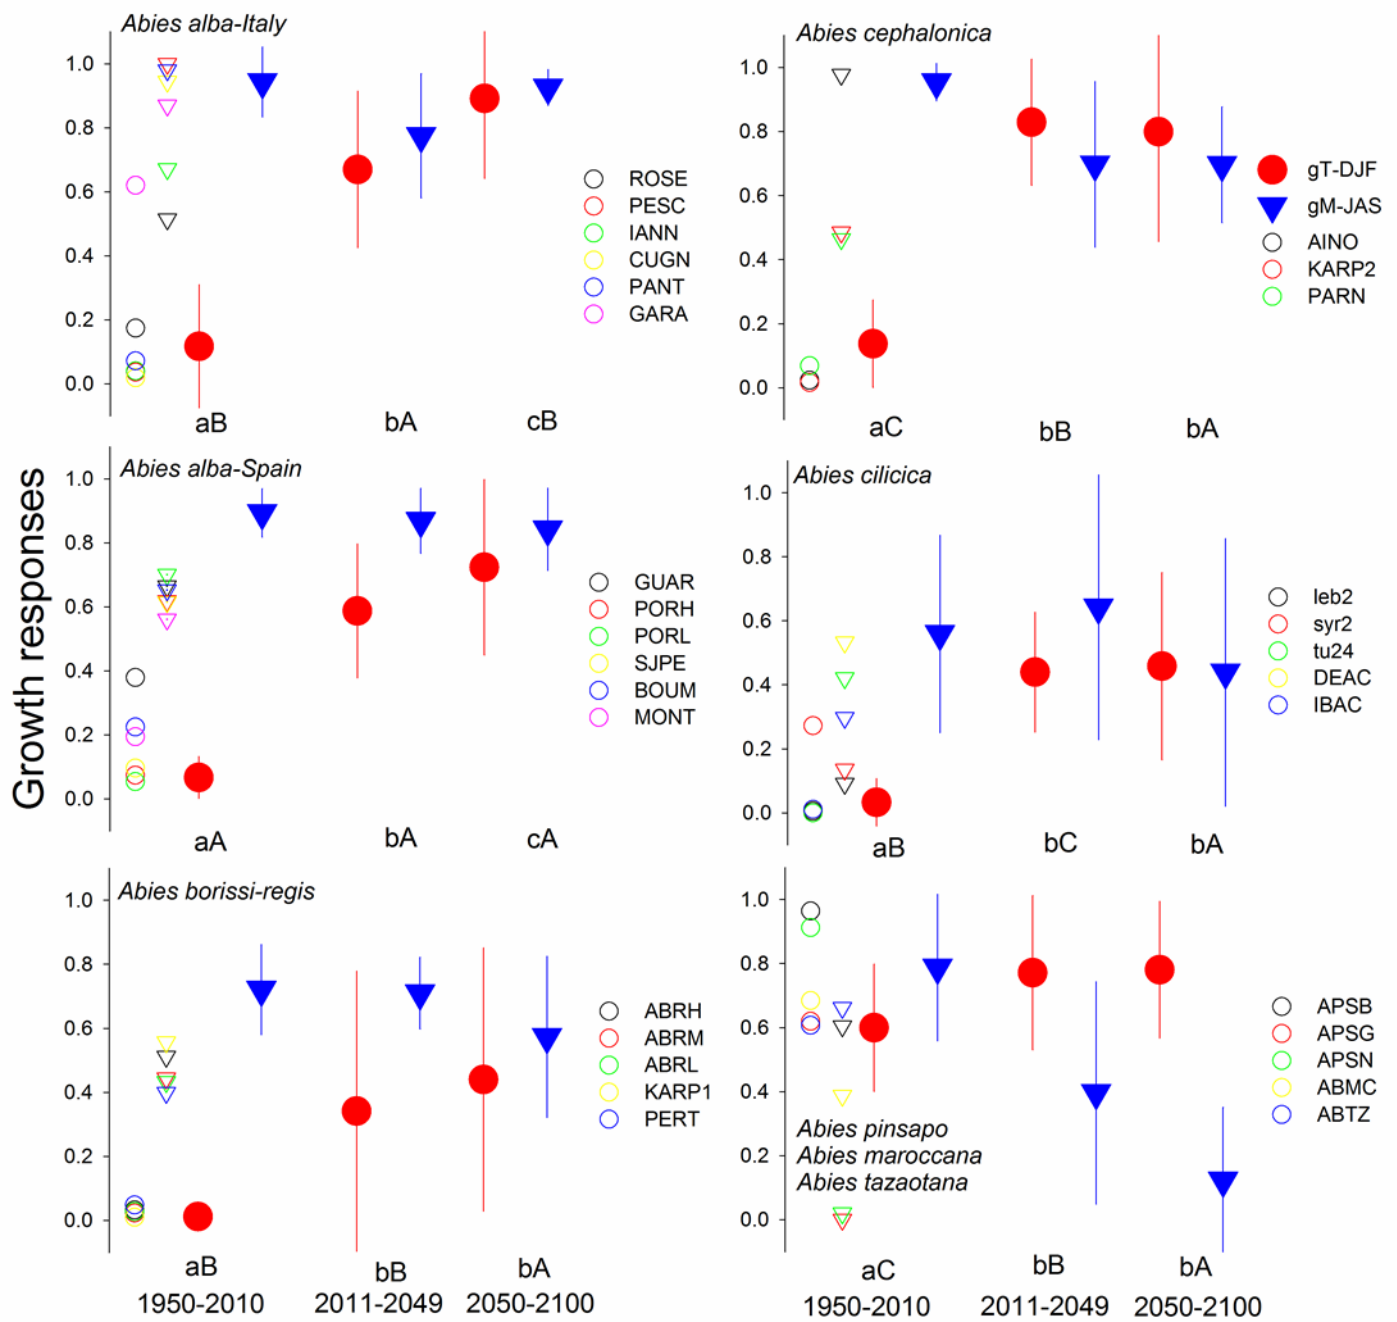

**Fig. S9.** Simulated winter ( $gT$ ) and summer ( $gM$ ) growth responses for the observed and forecasted periods. Simulated (VS-Lite) mean growth response representing winter (DJF) temperature ( $gT$ , red circles-mean and SD) and late summer (JAS) soil moisture limitations ( $gM$ , blue triangles-mean and SD) for each *Abies* species. Values were fitted for one observed 1950-2010 period and two 21st century (2011-2049 and 2050-2100) periods based on RCP 8.5 emission scenario. Selected observed growth responses during extreme events (1950-2010 period, see Figs. 2 and 5) with extreme low growth rates are indicated in different colors on the left. These values defined the thresholds of vulnerability for each climate refugia under forecasted growth response for RCP 8.5 climate scenario. Different letters indicate significant ( $P < 0.05$ ) differences between observed and projected periods based on Tukey's HSD post-hoc tests (lowercase and uppercase letters correspond to the 2011-2049 and 2050-2100 periods, respectively).
